# Supplementary material
Source: publisher figshare collection journal article supplement (https://wiley.figshare.com/ndownloader/files/14991149)
Supplement: Supplementary file 1 [file 14991149]

	long	lat	el	dc	air_temp	smb	rating
9807514	4.35	-72.866666	2878	206.635854635929	252.942535355055	24	1
22687855	12.783333	-74.65	3408	436.744151425071	242.687102639098	41	1
13437158	-9.7	-73.366666	1256	122.320606800591	263.292110938988	140	1
19126583	7.216666	-74.4	3169.5	389.721105560156	246.03329090045	53	1
19026307	1.966666	-74.5	2847.5	324.243185699186	247.080350602062	91	1
21628897	-2.55	-74.866666	2818	348.236377412794	248.786698981862	46	1
22499624	3.916666	-74.966666	3023	391.414562822626	246.534094375424	59	1
23583397	8.016666	-75	3235.5	455.578986622731	245.488741988206	50	1
22499066	0.016666	-75	2885	371.64576066362	246.778600013774	71	1
26338612	11.35	-75.216666	3355.5	499.265040382383	243.231858759151	47	1
27191225	-3.433333	-75.583333	2668.5	350.152381982508	249.346149081621	57	1
28509566	3.283333	-75.75	2965	468.218099087706	246.549415853321	60	1
30729087	7.216666	-75.933333	3145.5	528.465983019641	244.918243945064	45	1
1777547	-8.433333	-70.716666	51.5	43.8620939600842	273.662119938872	317	1
18566780	-9.75	-74.216666	1344.5	124.374978289728	260.190323245828	125	1
19026307.1	1.966666	-74.5	2847.5	324.243185699186	247.080350602062	89	1
20376920	4	-74.666666	2977.5	361.740560043696	246.545744898622	86	1
20717763	1	-74.75	2883	346.211447085122	246.698653043012	68	1
22604429	-8.5	-74.85	2554.5	185.028432955881	254.631479860641	76	1
22168122	-1.5	-74.95	2838	367.943862629249	247.74059492071	53	1
22499068	0.033333	-75	2886	371.66033173339	246.778600207874	62	1
22499068.1	0.033333	-75	2886	371.66033173339	246.778600207874	67	1
22499066.1	0.016666	-75	2885	371.64576066362	246.778600013774	62	1
22833632	-4.5	-75	2744	297.587621134911	250.4119	47	1
23199811	-6.5	-75	2635	244.063997378569	251.92516981259	62	1
23827685	6.5	-75.083333	3161	437.316669206697	246.109271696106	58	1
23214726	2.5	-75.083333	2973	390.938711288713	246.524394186962	64	1
24458371	6.5	-75.166666	3165.5	445.126062490483	246.052488068462	47	1
24154842	5	-75.166666	3103.5	424.365842701248	246.46422644135	48	1
23758702	-1	-75.166666	2839.5	390.674422644842	247.589857883406	44	1
25084945	6.5	-75.25	3161.5	452.990380973763	245.988428569705	38	1
24984849	-6	-75.25	2630.5	269.306171160886	251.842286492513	50	1
27191225.1	-3.433333	-75.583333	2668.5	350.152381982508	249.346149081621	59	1
30754411	-57.685	-64.201666	1512.5	48.853088187816	278.683799109461	620	1
338506165	139.898544	-66.695922	25	4.88702809482402	270.914141475584	1.17	1
338465444	139.869003	-66.698478	112	5.61683520397037	270.85185137711	138.67	1
338479047	139.880127	-66.698486	81	5.45261892330732	270.853442318826	113.4	1
338492616	139.891479	-66.698608	51	5.27191319826342	270.852511567732	45.6	1
338451828	139.854523	-66.699333	139	5.970283113981	270.830124254359	228	1
338431395	139.839798	-66.700668	170	6.42044352324004	270.79729386974	351.17	1
338410951	139.823624	-66.701988	193	6.94156719885308	270.764374778715	195.5	1
338390491	139.808792	-66.703491	213	7.47099410936835	270.727264863665	160.83	1
338383666	139.802109	-66.705513	220	7.82266209440312	270.679359432289	441.17	1
338356354	139.783768	-66.706886	244	8.42884548216444	270.644158081574	335	1
338342687	139.774628	-66.708938	255	8.84724387229975	270.594604375211	216.67	1
338329015	139.762772	-66.710899	267	9.3306755911945	270.546387358987	447.5	1
338287969	139.739975	-66.715972	302	10.394864474486	270.422093190691	546.67	1
338253726	139.723724	-66.722152	331	11.3801665805734	270.271453120064	440.17	1
338219452	139.699875	-66.726837	358	12.4629986161312	270.153339349673	348.17	1
338178296	139.677048	-66.731636	416	13.538264647633	270.031617704052	364.5	1
338143980	139.655716	-66.736763	472	14.2617209829544	269.901321972178	434.33	1
338109641	139.633621	-66.74189	505	15.0214516055989	269.769866530653	348.83	1
338068415	139.608719	-66.746559	530	15.8119365292726	269.647952257076	163	1
338034063	139.5914	-66.75196	546	16.6183884857018	269.509822252319	51.5	1
337999751	139.578308	-66.760154	562	17.6686019121681	269.304041160558	353.83	1
337965384	139.567749	-66.767456	574	18.5901505578891	268.834636242285	486.33	1
337931073	139.556824	-66.774955	585	19.5391071670651	268.648049951805	607	1
337896798	139.545898	-66.783577	599	20.6056991259438	268.435854460202	836.5	1
337862528	139.53212	-66.79026	610	21.518392109078	268.270650173163	250.5	1
337828313	139.520401	-66.79795	623	22.5038306962131	268.084225047934	392.33	1
337794123	139.509323	-66.805938	635	23.5100268975685	267.893614448031	370.67	1
337759935	139.496826	-66.813079	647	24.4541720870797	267.724504104908	423.67	1
337725722	139.485672	-66.820678	660	25.4231688582093	267.548366601223	595	1
337691482	139.475037	-66.828445	672	26.4006764728265	267.371998248507	685	1
337657167	139.462341	-66.83596	689	27.3891586487656	267.203606785509	249	1
337622813	139.449539	-66.843345	710	28.3673780081516	267.041432939739	645.67	1
337588470	139.438278	-66.851356	738	29.3819454974987	266.870899304019	492.33	1
337554108	139.425079	-66.858642	765	30.3588672199316	266.718231703062	399.5	1
337519730	139.413483	-66.866157	789	31.3302076122948	266.565781140717	279.17	1
337519730.1	139.413483	-66.866157	789	31.3302076122948	266.565781140717	260	1
337450855	139.386749	-66.880363	835	33.2469670755455	266.286855694416	533.33	1
337416379	139.375931	-66.889015	862	34.2950529454749	266.127314025104	274	1
337381780	139.3638	-66.896553	882	35.2393056992143	265.991838948965	305.83	1
337347082	139.354141	-66.905105	902.5	36.266700725403	265.845607844585	956.6	1
337312369	139.341415	-66.911621	920.5	37.1122447666301	265.735599053793	217.83	1
337277651	139.331818	-66.920227	937.5	38.1467702414151	265.598942049072	597.67	1
337242908	139.317398	-66.927711	950.5	39.1207460722468	265.482136335104	824.83	1
337208112	139.304123	-66.935859	962.5	40.1543660944946	265.361204243942	265.5	1
337137978	139.279938	-66.949951	979.5	41.9630401350956	265.163939905332	383.83	1
337067231	139.256668	-66.965805	994.5	43.9519902720423	264.962084952326	630.5	1
336996379	139.231918	-66.980636	1010.5	45.8577936786985	264.788915931987	318.83	1
336925448	139.209412	-66.996376	1028.5	47.8316954310854	264.623697977136	137	1
336854516	139.18074	-67.010131	1048.5	49.6917039883407	264.489208295461	371.17	1
336783398	139.157898	-67.025962	1068.5	51.6867638321887	264.353089903726	644.5	1
336711975	139.136581	-67.041801	1102.5	53.6609335708053	264.231951388375	333.2	1
336640201	139.112869	-67.057273	1156.5	55.6353471761012	264.125164175349	354.4	1
336568174	139.088043	-67.072456	1190.5	57.599534700104	264.030721480734	133.2	1
336495933	139.063644	-67.087738	1208.5	59.5694259415227	263.945738014344	363.4	1
336401776	139.039551	-67.108924	1228.5	62.1245266387249	263.847117655795	278.2	1
336314640	139.016449	-67.130058	1246.5	64.5334703583319	263.764063432507	303.8	1
336220066	138.992218	-67.15158	1264.5	66.9936601294541	263.691791749095	372.8	1
336132722	138.96875	-67.172988	1278.5	69.4445276400283	263.630619887713	47.8	1
336037938	138.944916	-67.194412	1295.5	71.9084012143567	263.577216515073	170	1
335950155	138.921722	-67.215286	1320.5	74.2912736676757	263.530900030526	375.8	1
335854983	138.896973	-67.237007	1350.5	76.6477298707762	263.485990587566	382.4	1
335766721	138.874146	-67.257766	1375.5	78.8876557249017	263.423437846946	450	1
335677340	138.851578	-67.279335	1392.5	81.2341905194637	263.387020413047	259.8	1
335587222	138.827225	-67.29985	1412.5	83.4758934735415	263.346259870256	515.2	1
335489157	138.803146	-67.320846	1440.5	85.7865327486604	263.301964295028	124.4	1
335398406	138.780975	-67.341987	1466.5	88.1274070536302	263.256529103933	190	1
335307460	138.757523	-67.363243	1483.5	90.4922570267209	263.203781840237	488.2	1
335215752	138.733871	-67.3833	1507.5	92.7350998782737	263.146281433968	264.6	1
335108641	138.684479	-67.398948	1537.5	94.5368164164444	263.030350408679	141.75	1
335009067	138.630768	-67.411483	1554.5	96.0503793525476	262.915581664645	360	1
334917023	138.579102	-67.42337	1569.5	97.5366435661865	262.825807537099	310.4	1
334824815	138.527097	-67.433709	1582.5	98.8994538916501	262.760447440181	269.25	1
334732387	138.476996	-67.445195	1598.5	100.423496508533	262.717691654514	227.5	1
334639350	138.426573	-67.456521	1603.5	101.971421182193	262.688931956663	308.67	1
334546206	138.374501	-67.467425	1625.5	103.52321033207	262.673829315227	261.75	1
334445338	138.3261	-67.48021	1644.5	105.285983457374	262.666175763918	148	1
334360020	138.275311	-67.490328	1648.5	106.798333556494	262.662259023618	166.5	1
334267016	138.225423	-67.501976	1651.5	108.503647600065	262.66033129512	22.25	1
334174025	138.175493	-67.512683	1648.5	110.138498389603	262.659759465534	208	1
334081021	138.123259	-67.524281	1642.5	111.923951649309	262.659571409328	291	1
333988015	138.07516	-67.535525	1676.5	113.48905561087	262.659528915925	223	1
333895078	138.022617	-67.546322	1725.5	115.03563905118	262.659520972913	545.333	1
333802246	137.973824	-67.558242	1735.5	116.710977950002	262.659476990687	313	1
333709452	137.921136	-67.56938	1732.5	118.363379616814	262.659367326278	64	1
333616642	137.867124	-67.579185	1739.5	119.916728701811	262.65901410733	280	1
333523793	137.820931	-67.591877	1751.5	121.738096016212	262.658106322445	302.25	1
333430872	137.769781	-67.603462	1760.5	123.513782201573	262.656042147786	167	1
333329614	137.718554	-67.61475	1756.5	125.285222011188	262.651995510896	41.5	1
333235431	137.669282	-67.626825	1763.5	127.143574061255	262.644817106786	62.5	1
333109811	137.596807	-67.641944	1773.5	129.636014459439	262.626336312891	483.25	1
332960425	137.524393	-67.660074	1808.5	132.493034464741	262.591805919053	453.25	1
14949741	7.983333	-73.716666	3173	350.43545622355	248.053856236195	55.9	1
39454689	22.466666	-76.066666	3575.5	613.406140244236	239.997015890964	28	1
49349016	26.05	-77	3587	722.65249631175	238.696472410375	23.7	1
65308250	32.85	-78.216666	3588.5	896.90614870192	237.448654081725	17.5	1
71722727	35.633333	-78.65	3611.5	965.584534297323	236.622316587688	20.1	1
101960328	44.85	-80.783333	3669.5	1211.17264477017	235.924879439012	16	1
82411663	8.566666	-81.7	2452	860.167892342777	245.859619349243	49.2	1
124706969	54.883333	-82.066666	3728.5	1399.19329307513	235.410242427595	26.1	1
96272620	17.866666	-82.633333	2570	1013.80375339907	243.539447230038	37.6	1
98880040	18.9	-82.816666	2596.5	1026.71522623382	243.639252058817	36.1	1
114882216	21.9	-84.133333	2654	1059.8952911651	242.782497462381	45.3	1
137398330	53.533333	-84.183333	3423.5	1403.18027570539	237.342911813256	30	1
152724625	1.8	-87.85	2616.5	1071.23566486765	241.353000284114	63.4	1
14971042	7.98	-73.72	3172	350.787295382908	248.054017317027	52	1
49349016.1	26.05	-77	3587	722.65249631175	238.696472410375	22	1
65342421	32.85	-78.22	3587.5	897.248521102927	237.448971527806	19	1
101938224	44.85	-80.78	3669.5	1210.80919108946	235.925289706969	16	1
137376946	53.53	-84.18	3423.5	1403.31445464384	237.342712671655	32	1
29974694	-57.52334	-64.1419	1196.5	51.0762459836823	278.877462936779	206	1
30889587	-57.789	-64.15911	1185.5	41.9422218573835	278.557097415257	488	1
30139165	-57.52398	-64.17889	1167.5	53.3103419672521	278.876870686888	236	1
30709344	-57.67759	-64.19614	1510.5	48.7003186345768	278.69683995264	377	1
31492614	-57.918611	-64.199722	1114.5	40.8664670390811	278.308209055594	498	1
30994876	-57.745555	-64.213055	1506.5	47.669452305603	278.580082651776	529	1
30664311	-57.633333	-64.216666	1538.5	51.8205310049328	278.749278267451	481	1
30994876.1	-57.745555	-64.213055	1506.5	47.669452305603	278.580082651776	604	1
30634278	-57.628888	-64.214166	1546.5	51.7924703672318	278.755537888214	163.25	1
30634278.1	-57.628888	-64.214166	1546.5	51.7924703672318	278.755537888214	130.6	1
30634278.2	-57.628888	-64.214166	1546.5	51.7924703672318	278.755537888214	146	1
31009927	-57.710277	-64.238055	1390.5	50.8660617780506	278.631826096607	466	1
30679347	-57.588055	-64.250277	1119.5	55.9730958066991	278.823397287321	475	1
31447325	-57.811666	-64.264722	1277.5	45.9142712636203	278.419027827412	726	1
31100289	-57.67532	-64.28347	344.5	52.3663933726846	278.688653423366	630	1
31809602	-57.90276	-64.27948	1092.5	41.4189449459603	278.242202367724	865	1
31492677	-57.78394	-64.29401	1126.5	47.089831349495	278.459608092956	576	1
30664311.1	-57.633333	-64.216666	1538.5	51.8205310049328	278.749278267451	490	1
96217664	-68.28	-71.18	299	194.905402525417	273.544013020322	153	1
98360558	-68	-71.87	27.5	187.642363286369	272.636298853296	261	1
95865057	-67.08	-72.03	49	155.221851355181	272.409966048	536	1
99622778	-67.98	-72.16	33	185.813391567223	272.644292445539	486	1
284125435	112.333333	-66.5	1182.5	68.0380862076313	271.973197266878	142	1
178669054	0	-90	2758	1249.30391261843	241.294325	76.5	1
309820391	169.466	-78.128	9.5	67.4616864933102	262.028006409321	130	1
308411028	170.493	-78.348	23	76.2038542546539	262.021922462732	140	1
306498491	171.457	-78.613	26	91.6550485406731	261.76460368325	140	1
306276881	172.735	-78.674	26	119.343484295512	261.630107654831	130	1
305250911	170.502	-78.727	26	70.8942400316876	261.365935030337	190	1
302347733	169.236	-78.998	28.5	56.7360328768503	261.097951605836	190	1
300746320	165.549	-79.012	44	47.1159803735956	263.387521978839	130	1
126717422	43	-84	3324.5	1300.28970098342	239.250897388443	40	1
127429612	77.066666	-70.833333	1847	190.774023367136	262.532705396177	286	1
133596386	77.933333	-72.016666	2351.5	321.13412012616	255.426213908974	118	1
139607380	76.833333	-75.716666	2800	732.92149355245	249.811834274061	12	1
147095126	77	-78.333333	3364	1023.55948749719	242.31215586079	62	1
148849202	77	-79	3726	1097.66623227981	237.742859503012	26	1
153140241	77.35	-80.366666	4086.5	1249.49122686366	234.316465993635	19	1
66589179	39.703333	-77.316944	3792	815.50548570795	235.780640659891	32	1
220167625	106.84	-78.45	3487	1212.75661265117	235.478196229163	19	1
220167625.1	106.84	-78.45	3487	1212.75661265117	235.478196229163	20	1
220167625.2	106.84	-78.45	3487	1212.75661265117	235.478196229163	23	1
220167625.3	106.84	-78.45	3487	1212.75661265117	235.478196229163	21	1
220167625.4	106.84	-78.45	3487	1212.75661265117	235.478196229163	23	1
220167625.5	106.84	-78.45	3487	1212.75661265117	235.478196229163	20	1
220167625.6	106.84	-78.45	3487	1212.75661265117	235.478196229163	21	1
220167625.7	106.84	-78.45	3487	1212.75661265117	235.478196229163	21	1
220167625.8	106.84	-78.45	3487	1212.75661265117	235.478196229163	23	1
324515568	155.97	-74.03	2083	227.565577995383	248.826934375496	112	1
322546395	155.31	-74.45	2051	223.035865112226	250.770669962799	251	1
324530709	155.96	-74.025333	2088	228.110568170297	248.810579422573	98	1
322788258	157.502166	-74.644833	1807	154.683325204326	253.427795294787	55	1
318877370	151.2695	-74.8045	2338	324.308295505003	246.981970965624	8.5	1
23310158	2.053833	-75.1	2948	389.795456039925	246.597348429646	39	1
287455900	129.808833	-75.4475	3046	866.827386209215	239.924718583727	39	1
311986008	145.857166	-75.536	2481	451.865054880891	243.688055735208	47	1
297941156	135.8315	-75.598	2814	708.641876762445	241.639170890157	29	1
305420745	140.630666	-75.622166	2631.5	587.098029151277	242.605718035037	30	1
338926305	158.866666	-70.683333	1884	89.6869326532043	261.364391319583	252	1
338926305.1	158.866666	-70.683333	1884	89.6869326532043	261.364391319583	234	1
334293398	158.533333	-71.883333	2202.5	201.159868085667	253.716048030438	135	1
334293398.1	158.533333	-71.883333	2202.5	201.159868085667	253.716048030438	129	1
332442652	158.75	-72.366666	2238	245.485240904193	253.617171248309	101	1
330957886	159.083333	-72.766666	2331	236.002922460245	251.430208208665	74	1
330957886.1	159.083333	-72.766666	2331	236.002922460245	251.430208208665	83.6	1
330824487	159.1	-72.8	2331	233.090640496036	251.122835489541	81	1
330824487.1	159.1	-72.8	2331	233.090640496036	251.122835489541	86.6	1
327821198	157.666666	-73.383333	2231.5	236.389276400846	249.048341484767	98	1
324500377	155.966666	-74.033333	2080	227.441806112116	248.835647063185	98.7	1
324500377.1	155.966666	-74.033333	2080	227.441806112116	248.835647063185	112	1
324500377.2	155.966666	-74.033333	2080	227.441806112116	248.835647063185	98	1
324386344	156	-74.066666	2059	224.533852439907	248.956266228059	137	1
327821198.1	157.666666	-73.383333	2231.5	236.389276400846	249.048341484767	101	1
324530709.1	155.9595	-74.025333	2088	228.123210273334	248.81042549049	112	1
324424368	156.010666	-74.0585	2062	224.764615800087	248.930374676685	137	1
322860673	157.38	-74.6135	1810	159.315775532905	253.282865476234	137	1
322788258.1	157.502166	-74.644833	1807	154.683325204326	253.427795294787	54	1
322788258.2	157.502166	-74.644833	1807	154.683325204326	253.427795294787	60	1
318803285	151.0985	-74.800166	2329	329.261944008325	246.877839717264	44	1
318877370.1	151.2695	-74.804666	2338	324.303848826376	246.982073176779	15	1
323436982	160.66	-74.80566	1338.5	63.1345985393156	257.381033168292	58	1
323436982.1	160.66	-74.80566	1338.5	63.1345985393156	257.381033168292	47	1
318704279	151.152166	-74.831	2330	326.931686916921	246.947541683547	82	1
277631734	123.830833	-74.909166	3243	881.098453575656	237.278688880626	32	1
274352118	122.647166	-74.9885	3237.5	898.780013416835	236.965370255297	30	1
290143127	129.634	-75.007338	3072.5	874.965346643038	239.770145637589	22	1
275516813	123.188333	-75.008333	3244.5	896.503697886398	236.966894996664	29	1
276505015	123.604333	-75.008833	3247	893.449437509575	237.048116987294	26	1
276505015.1	123.604333	-75.008833	3247	893.449437509575	237.048116987294	29	1
274924366	123.0325	-75.047666	3244.5	901.930823257716	236.966787032365	27	1
277493116	124.266166	-75.099833	3240	898.856342724957	237.420596685996	29	1
275141376	123.312	-75.122	3247.5	907.753924105583	236.983955980103	29	1
274450741	123.098666	-75.152666	3247.5	912.651640648822	236.975958015931	33	1
275971407	123.7585	-75.154833	3243.5	908.112530297695	237.209643861985	23	1
274411225	123.1855	-75.194666	3246.5	916.495560212312	236.994556788328	26	1
274805887	123.394166	-75.208666	3245.5	916.466111938052	237.041192727777	26	1
275319032	123.8305	-75.291833	3235.5	922.438268360677	237.250634169269	28	1
273264399	122.9575	-75.295166	3242.5	928.98944314561	236.99841809328	27	1
273244577	122.944333	-75.295166	3243.5	929.090146698872	236.996594177215	30	1
273264400	122.950666	-75.295333	3243.5	929.059558597655	236.997510477288	29	1
287436304	129.706833	-75.419833	3051	870.755348659468	239.887886988387	38	1
287455900.1	129.808833	-75.4475	3046	866.827386209215	239.924718583727	29	1
287455900.2	129.808833	-75.4475	3046	866.827386209215	239.924718583727	39	1
312086769	145.9225	-75.529	2473	450.354461280354	243.706357194197	60	1
311986008.1	145.857166	-75.536	2481	451.865054880891	243.688055735208	45	1
311986008.2	145.857166	-75.536	2481	451.865054880891	243.688055735208	47	1
311849645	145.7885	-75.5505	2487	453.226043830365	243.666109003101	11	1
297850941	135.679	-75.573833	2816	713.602301607572	241.613267899472	20	1
297941156.1	135.8315	-75.598	2814	708.641876762445	241.639170890157	29	1
305337967	140.475666	-75.601	2636	591.97403355662	242.590208265235	38	1
297526145	135.673833	-75.618833	2815	711.629950084077	241.614187419121	29	1
305420745.1	140.630666	-75.622166	2631.5	587.098029151277	242.605718035037	31	1
305021189	140.476833	-75.646	2637.5	589.843441196725	242.530946566428	40	1
178669054.1	0	-90	2758	1249.30391261843	241.294325	78	1
4313080	22.98594	-70.14508	52	44.5231417819172	272.707622369777	485.19064	1
4409404	23.02947	-70.1681	53	42.5062690027419	272.696337318084	456.6442	1
4506153	23.0731	-70.19098	51	39.88238758568	272.680636329678	600.912136	1
4603410	23.11519	-70.21311	48	37.2958022497507	272.678391542727	519.426173	1
4700990	23.15901	-70.23597	48.5	34.4930697264205	272.678976568395	539.767526	1
4785615	23.19771	-70.25611	50.5	32.0193425864218	272.68190686312	546.690076	1
4883306	23.22122	-70.28232	58.5	28.9842082183418	272.681887416744	496.2076	1
4980974	23.24467	-70.30826	64.5	25.9813970013217	272.684202399745	555.207343	1
5078498	23.26763	-70.33412	62.5	22.9941256291059	272.688532852847	496.408703	1
5175910	23.29129	-70.36015	62	19.9785077732637	272.69502303472	491.767616	1
5274087	23.31439	-70.38595	68	16.9876625136388	272.702876472558	437.31352	1
5374060	23.33618	-70.41122	71	14.0663510076935	272.711141445639	567.826554	1
5477209	23.35907	-70.43736	73	11.0425166749937	272.719894819783	308.906223	1
5582742	23.38278	-70.46327	61	8.03579743433141	272.728122188302	367.486323	1
5689892	23.40451	-70.48941	44	5.04455920433389	272.734440557836	382.211866	1
5799590	23.43007	-70.51528	49	2.05816342994447	272.734741036259	404.743593	1
5913192	23.45425	-70.54122	55	0.982939408413295	272.738508579881	503.713863	1
6030538	23.48049	-70.56617	62	3.91579283455485	272.741007620485	667.680523	1
6151065	23.50268	-70.59159	63	6.85249091801631	272.741336780431	543.0933	1
6274895	23.52652	-70.61755	63	9.86890877520708	272.740565775095	589.661276	1
6402634	23.55062	-70.64345	62	12.882275046809	272.738539905441	915.793476	1
6532293	23.57338	-70.66947	61	15.8930398974591	272.734885853196	624.924513	1
6662831	23.6015	-70.6948	72	18.8914214687084	272.730476996809	567.916056	1
6759065	23.61613	-70.71403	109	21.09117882274	272.724955539945	546.234041	1
6882131	23.61501	-70.74174	149	24.0324994898148	272.711377021561	565.2073	1
7005492	23.61751	-70.76945	204	27.0366674431926	272.676891611049	580.256493	1
7128706	23.61784	-70.79639	251	29.9557895315198	272.647658325444	621.5688	1
7251868	23.62805	-70.82304	286.5	32.9305975781101	272.612055596932	413.17293	1
7366135	23.61793	-70.84932	308.5	35.7242606186084	272.562986700327	683.629103	1
7489182	23.61766	-70.87641	330.5	38.6769060297949	272.500927374553	522.762576	1
7603772	23.61629	-70.90292	357.5	41.5503201721312	272.423930589687	499.94184	1
7727939	23.615	-70.93002	374.5	44.4854316008405	272.325248396111	580.568413	1
7853089	23.61583	-70.95666	394	47.3884644572639	272.204897962692	549.419633	1
7969563	23.61367	-70.98345	406	50.2879444603123	272.055407512518	411.095103	1
8095263	23.61454	-71.01055	414	53.2507192015478	271.871279997142	494.038136	1
8221206	23.61539	-71.03796	420	56.2452218129496	271.646029946777	427.827414	1
8347430	23.6159	-71.06564	426	59.2582207466829	271.192937625533	561.78338	1
8474020	23.61446	-71.09344	432.5	62.2760363327524	270.841461285046	437.47123	1
8600867	23.61243	-71.12047	441.5	65.2127167672929	270.451421061437	376.538214	1
8728029	23.61263	-71.14763	454.5	68.1732647124069	270.013738926934	444.22044	1
8855313	23.61326	-71.17539	473.5	71.2053773498216	269.523892710405	564.077756	1
8982510	23.61147	-71.20245	499.5	74.1496236200982	269.013180500732	531.597871	1
9110145	23.61178	-71.2296	524.5	77.1219418403674	268.478742127109	315.278025	1
9238210	23.6119	-71.25684	567	80.1064609605654	267.933201964494	342.249703	1
9357761	23.6112	-71.28332	602	83.0060507855142	267.407098699005	235.871727	1
9496018	23.61211	-71.31177	648	86.1340531830735	266.860298712951	257.388995	1
9625295	23.61432	-71.33912	700	89.150714957838	266.36453496608	247.34634	1
9755191	23.6113	-71.3663	736	92.1229037756795	265.911274935514	248.827099	1
9875917	23.61134	-71.39329	765	95.0928573335661	265.267865714778	161.015173	1
10145468	23.60912	-71.44984	803	101.310693026058	264.628818034812	96.91448	1
10275506	23.61142	-71.47672	805	104.284506035575	264.391131211955	318.483528	1
10405730	23.61125	-71.50329	815	107.213992671997	264.1938915392	243.475664	1
10526834	23.60818	-71.52989	873	110.135658038884	264.029858932481	220.128694	1
10658131	23.60744	-71.55688	928	113.112062926493	263.891095186177	459.509529	1
10780897	23.60482	-71.58401	970	116.097656293766	263.776637960222	228.678729	1
10913350	23.6011	-71.61075	998	119.037561018238	263.68404040289	156.905248	1
11045973	23.5976	-71.63856	1007	122.098396658848	263.604413264536	418.566515	1
11169386	23.59504	-71.666	1048	125.119960504061	263.538786221597	536.962279	1
11311932	23.6011	-71.69412	1122	128.250496781653	263.452501267522	723.357287	1
56518432	59.705	-68.62233	1835	133.896953162489	256.705254301806	135	1
58208461	60.255	-68.646	1858.5	131.592613657047	256.835053005214	270	1
60800855	61.120129	-68.654296	1842	123.479476939867	257.61881785304	153	1
316007137	126.93782	-68.97299	2188	217.155307161167	255.798352007954	278.2	1
305557594	121.80698	-69.00395	2050.5	244.230976497275	258.559728902008	241.6	1
311602349	124.33405	-69.00769	2235.5	251.104188700417	256.390728343637	258.25	1
308767208	123.05716	-69.0094	2158	248.275614848842	257.378599578872	198.6	1
301853353	120.5642	-69.0142	1996	235.231439133946	259.439076600181	308.6	1
238555000	-119.516666	-80.016666	1521.5	565.393210730111	259.667924065323	117	1
238555000.1	-119.516666	-80.016666	1521.5	565.393210730111	259.667924065323	67	1
88188687	-53.14083	-77.19389	39.5	381.162442386825	264.166510575247	189	1
95493313	-56.05933	-77.35783	45.5	354.844862940513	261.364077963229	199	1
99249726	-55.97833	-77.9375	48.5	413.492309505395	260.601982334628	166	1
105602044	-58.69056	-78.03361	47.5	403.503817438614	260.366658421183	176	1
108216882	-57.8475	-78.72167	53.5	465.157043848978	259.75828379605	156	1
128914870	-60.61472	-81.46306	108	546.366424086002	257.991057885798	92	1
125926664	-57.917	-81.617	116.5	512.778144520558	258.128940740825	89	1
239478707	-120	-80	1502	568.089959024653	259.688120338023	102.704	1
70838124	57.302056	-72.824579	2707	605.618415366182	247.877620855282	130	1
70855813	57.26894	-72.840775	2713	607.545358559565	247.635932978873	132.385	1
70855803	57.235824	-72.85697	2720	609.473686861746	247.628973930454	87.7725	1
70855792	57.202709	-72.873166	2724	611.403595241403	247.619411475828	51.4395	1
70873483	57.169593	-72.889362	2722	613.334961420546	247.607215255944	89.01	1
70873472	57.136477	-72.905557	2723	615.267650359494	247.592431608285	56.581	1
70873462	57.103361	-72.921753	2728	617.201862016825	247.575175974897	81.67075	1
70891157	57.070246	-72.937948	2733	619.1373514626	247.555620312793	83.121	1
70891147	57.03713	-72.954144	2733	621.074328247117	247.533987915424	13.699	1
70891136	57.004014	-72.97034	2727	623.012658093726	247.510544252188	110.25075	1
70908836	56.970898	-72.986535	2725	624.952211662059	247.485585899361	71.103	1
70908825	56.937783	-73.002731	2734	626.893184935241	247.459432523469	131.2	1
70926529	56.904667	-73.018926	2744	628.835348751962	247.432408418226	91.1225	1
70926518	56.871551	-73.035122	2746	630.778607151702	247.404838577481	83.845	1
70926508	56.838436	-73.051318	2741	632.722387102646	247.377029656999	74.029	1
70961937	56.813642	-73.068884	2736	634.776129657616	247.357579454744	99.796	1
70997378	56.788849	-73.08645	2732	636.830323701047	247.338475084277	114.444	1
71032834	56.764055	-73.104017	2729	638.88508066364	247.320034792712	55.488	1
71068307	56.739262	-73.121583	2730	640.940162442725	247.302538402286	81.09475	1
71103789	56.714468	-73.13915	2733	642.99579060373	247.286208192983	37.95275	1
71139280	56.689675	-73.156716	2733	645.051727205557	247.24706725999	99.40975	1
71174779	56.664881	-73.174283	2723	647.108194063557	247.236531135637	135.604	1
71210292	56.640088	-73.191849	2716	649.16495339453	247.227032600078	96.425	1
71245832	56.615294	-73.209416	2716	651.222227254897	247.218452746198	78.06375	1
71281388	56.590501	-73.226982	2722	653.279778015832	247.210551011799	83.73375	1
71334738	56.565707	-73.244549	2725	655.337827966259	247.202951668772	67.635	1
71370320	56.540914	-73.262115	2728	657.396139628347	247.195129039067	60.095	1
71405909	56.51612	-73.279682	2731	659.454935515241	247.186389294415	51.51	1
71441501	56.491327	-73.297248	2732	661.513978296864	247.175845774327	140.74775	1
71477099	56.466534	-73.314815	2728	663.573485261604	247.162389297536	80.70075	1
71512709	56.440108	-73.33201	2728	665.601522890816	247.140959971386	78.585	1
71530516	56.413682	-73.349206	2731	667.630124514628	247.112782644885	124.5195	1
71566152	56.387257	-73.366401	2737	669.65905710469	247.075694864376	62.511	1
71601802	56.360831	-73.383597	2738.5	671.688542401563	247.027289218723	120.198	1
71637471	56.334406	-73.400793	2737.5	673.718451553686	246.965191138917	121.7035	1
71673146	56.30798	-73.417988	2740.5	675.748678168552	246.887607151358	34.78675	1
71690980	56.281554	-73.435184	2747.5	677.779427531601	246.794240428594	80.8015	1
71726649	56.255129	-73.452379	2752.5	679.81046717529	246.687292925452	66	1
71762322	56.228703	-73.469575	2756.5	681.84201939872	246.571117706553	63.4	1
71798001	56.202278	-73.486771	2761.5	683.873955631283	246.455270087512	48.9	1
71833687	56.175852	-73.503966	2761.5	685.906170362256	246.34714011508	68.4285	1
71869381	56.149426	-73.521162	2756.5	687.938868954982	246.253028025272	101.745	1
71887222	56.123001	-73.538357	2751.5	689.97181947661	246.176312688072	56.0595	1
71922896	56.096575	-73.555553	2751.5	692.005244736377	246.117137081397	39.203	1
71958532	56.07015	-73.572749	2754.5	694.039016426473	246.073588894623	150.643	1
71994173	56.043449	-73.590022	2755.5	696.083175772655	246.04248469236	87.4605	1
72029830	56.016748	-73.607296	2754.5	698.127793965562	246.022617726902	73.74275	1
72065495	55.990047	-73.624569	2751.5	700.172645337094	246.009535930654	89.5235	1
72101171	55.963346	-73.641843	2748.5	702.217941018177	246.002160998422	87.34	1
72136854	55.936645	-73.659117	2745.5	704.263564708714	245.998888069633	101.92975	1
72154694	55.909944	-73.67639	2746.5	706.309400282664	245.998437233271	123.849	1
72190390	55.883243	-73.693664	2749.5	708.355658975336	245.999770690614	116.721	1
72226093	55.856542	-73.710937	2751.5	710.402115756881	246.002018836092	104.643	1
72261805	55.829841	-73.728211	2750.5	712.448981926606	246.004454521671	67.518	1
72297524	55.80314	-73.745485	2748.5	714.49614169531	246.006463522817	97.7625	1
72333246	55.776439	-73.762758	2748.5	716.543479442232	246.007542886653	96.1825	1
72368975	55.749738	-73.780032	2750	718.591206554678	246.007304172488	84.03625	1
72404707	55.723037	-73.797305	2752	720.506603741888	246.005465916384	110.69875	1
72440433	55.696336	-73.814579	2752	720.813925485022	246.001862425439	147.75	1
72476156	55.669635	-73.831853	2751	721.128811917752	245.968066330337	84.4145	1
72601245	55.677592	-73.849602	2742	722.386456435167	245.983783177463	74.96475	1
72708628	55.68555	-73.867352	2737	723.647025524032	245.998780774898	72.814	1
72834374	55.693508	-73.885102	2733	724.910418742473	246.012874197689	63.63525	1
72942620	55.701465	-73.902851	2730	726.176535218667	246.025915645426	74.58325	1
73069344	55.709423	-73.920601	2731	727.445531302116	246.037791057628	115.9275	1
73178311	55.717381	-73.938351	2740	728.71730639045	246.04840581039	65.352	1
73305631	55.725339	-73.956101	2733	729.991845586775	246.057683307638	48.888	1
73415093	55.733296	-73.97385	2715	731.269047819369	246.065557700728	168.05475	1
73543212	55.741254	-73.9916	2698	732.549070709918	246.071973885013	143.206	1
73671905	55.749212	-74.00935	2694	733.831813452456	246.076879713896	72.38	1
73782766	55.75717	-74.0271	2695	735.020065479324	246.080229297725	45.696	1
73912834	55.765127	-74.044849	2703	736.197840782109	246.081982467207	0	1
74024533	55.773085	-74.062599	2710	737.378720470933	246.082109409722	151.18925	1
74154968	55.781043	-74.080349	2717	738.56260867684	246.080590851279	104.286	1
74266747	55.789001	-74.098099	2727	739.74949059245	246.077425195398	98.77425	1
74415828	55.799112	-74.120335	2738	741.244278790306	246.071283387478	80.465	1
74583540	55.809223	-74.142571	2742	742.743692166229	246.2613745275	29.673	1
74732561	55.819334	-74.164807	2736	744.247702037084	246.262448296645	78.2275	1
74881834	55.829445	-74.187043	2724.5	745.756279865703	246.260681942788	60.912	1
75031895	55.839556	-74.209279	2719.5	747.268282578919	246.256224066672	88.638	1
75182633	55.849667	-74.231515	2721.5	748.783007187562	246.24932339031	76.838	1
75334066	55.859778	-74.253751	2726.5	750.300357097996	246.240321368398	95.604	1
75504561	55.869889	-74.275987	2727.5	751.822180398092	246.229634007912	129.2225	1
75656203	55.88	-74.298223	2725.5	753.348449258235	246.217724901827	67.61925	1
75807851	55.890111	-74.320459	2720.5	754.879135994939	246.205073215859	105.432	1
75959272	55.900222	-74.342695	2712.5	756.414213070995	246.192141215404	67.8015	1
76110476	55.910333	-74.364932	2701.5	757.953710774986	245.940065455339	119.44625	1
76242636	55.918972	-74.382732	2688.5	759.20309871802	245.944080234121	121.0545	1
76355746	55.927611	-74.400532	2679.5	760.455187821604	245.948980404529	154.269	1
76487989	55.93625	-74.418333	2669.5	761.710022570085	245.954658868948	151.938	1
76601532	55.944889	-74.436133	2663.5	762.967473034158	245.960997698576	141.93725	1
76734146	55.953528	-74.453933	2663.5	764.227583643129	245.967871546342	105.892	1
76867202	55.962167	-74.471734	2664.5	765.490399597879	245.975150989753	151.064	1
76981555	55.970806	-74.489534	2665.5	766.75579008964	245.982704784922	169.27875	1
77115020	55.979446	-74.507334	2674.5	768.023825425784	245.990402513725	144.648	1
77229565	55.988085	-74.525135	2689.5	769.294501140175	246.086656754036	98.235	1
77363234	55.996724	-74.542935	2705.5	770.567710775269	246.085907804157	59.2925	1
77477827	56.005363	-74.560735	2714.5	771.843041357001	246.085433237088	12.4285	1
77611276	56.014002	-74.578536	2713.5	773.119954787394	246.085105167183	43.49975	1
77744696	56.022641	-74.596336	2706.5	774.399366787336	246.084801087876	88.629	1
77859007	56.03128	-74.614136	2698.5	775.681323819335	246.084402896633	92.349	1
77992177	56.03992	-74.631937	2694.5	776.965897864537	246.083801910008	138.9425	1
78106219	56.048706	-74.649713	2693.5	778.255090637691	246.083081348035	85.03125	1
78239084	56.057492	-74.66749	2693	779.546825456368	246.081991589528	254.475	1
78352842	56.066278	-74.685267	2694	780.841029378823	246.080474264292	312.675	1
78485732	56.075064	-74.703043	2690	782.137628856735	246.078497297945	108.48975	1
78599754	56.083851	-74.72082	2684	783.436757358974	246.076060507986	98.90975	1
78732863	56.092637	-74.738597	2674	784.738292583133	246.073202410848	153.51875	1
78847339	56.101423	-74.756374	2675	786.042246587682	246.070014264184	47.50425	1
78981310	56.110209	-74.77415	2680	787.34854541095	246.066646761009	68.2695	1
79116112	56.118995	-74.791927	2699	788.657299584745	246.063318717276	106.352	1
79234118	56.127782	-74.809704	2716	789.968459642353	246.060336975786	230.19975	1
79372233	56.136568	-74.827481	2724	791.281964854508	246.054270722238	37.03125	1
79490968	56.145354	-74.845257	2728	792.597765123879	246.053938273331	8.83325	1
79629601	56.15414	-74.863034	2730	793.91597251208	246.055337533631	25.03725	1
79748598	56.162926	-74.880811	2735	795.23651293306	246.061260968083	52.3305	1
79887936	56.171713	-74.898588	2735	796.559398309273	246.068112242544	197.57075	1
80007503	56.180824	-74.916316	2729	797.889251673978	246.080142494092	7.272	1
80146853	56.189936	-74.934044	2728	799.2213749562	246.097123584978	45.25875	1
80266041	56.199047	-74.951772	2730	800.555708808405	246.119462510113	29.7395	1
80405164	56.208159	-74.9695	2721.5	801.892289235841	246.147129099455	112.5355	1
80524386	56.21727	-74.987228	2712.5	803.231057227833	246.179481007896	41.514	1
80663481	56.226382	-75.004956	2711.5	804.572048687403	246.215257424555	88.344	1
80782978	56.235493	-75.022684	2721.5	805.915204939355	246.25268483414	97.58	1
80922819	56.244605	-75.040412	2733.5	807.260561784509	246.289806302222	35.03775	1
81042933	56.253716	-75.05814	2739.5	808.60806088175	246.324810487895	1.854	1
81183364	56.262828	-75.075868	2731.5	809.957737929694	246.356352574869	36.5505	1
81323961	56.271939	-75.093596	2718.5	811.309534919893	246.383655340281	67.5855	1
81444586	56.281051	-75.111324	2715.5	812.663487448746	246.406509745885	129.6875	1
81585683	56.290162	-75.129052	2724.5	814.019537839031	246.425119911122	40.352	1
81706904	56.299274	-75.14678	2740.5	815.377721584914	246.441016201616	25.6455	1
81848563	56.308386	-75.164509	2759.5	816.738069363722	246.452799668449	-4.389	1
81970094	56.317809	-75.182236	2774.5	818.107548209746	246.455898869719	15.012	1
82112041	56.327233	-75.199964	2787.5	819.479159060825	246.462295436277	23.712	1
82234012	56.336657	-75.217691	2806.5	820.852737856702	246.46687840757	-9.02625	1
82376807	56.34608	-75.235419	2819.5	822.228381587406	246.47004992461	51.543	1
82499637	56.355504	-75.253146	2826.5	823.605994710542	246.472124196786	32.52375	1
82643439	56.364928	-75.270874	2829.5	824.985674843293	246.473314055946	77.559	1
82766672	56.374352	-75.288601	2827	826.36728012936	246.473749841424	73.05525	1
82910810	56.383775	-75.306329	2826	827.750909125737	246.473477544621	128.54025	1
83034648	56.393199	-75.324056	2829	829.136464961154	246.472476982626	20.91	1
83179223	56.402623	-75.341784	2833	830.524046808203	246.470654604636	29.75475	1
83303412	56.412047	-75.359511	2836	831.913511914808	246.467860532761	54.774	1
83448468	56.42147	-75.377239	2837	833.304960379662	246.463884934246	31.746	1
83572668	56.430894	-75.394966	2837	834.698294022454	246.45847264232	12.18	1
83717562	56.440318	-75.412694	2841	836.093613546073	246.451312863014	14.27625	1
83841629	56.449742	-75.430422	2851	837.490842320855	246.44205201216	97.869	1
83986120	56.4595	-75.448211	2862	838.901504281133	246.430544954427	70.953	1
84109681	56.469258	-75.466	2869	840.314037127312	246.416061102475	104.661	1
84253555	56.479017	-75.48379	2870	841.728520537666	246.398112242341	134.064	1
84376858	56.488775	-75.501579	2871	843.144765617108	246.417152151051	141.332	1
84520926	56.498533	-75.519369	2880	844.562919736473	246.390385479708	128.375	1
84665171	56.508292	-75.537158	2891	845.98285997763	246.357870027986	29.55	1
84788950	56.51805	-75.554948	2896	847.40466804968	246.318978723808	19.11	1
84933542	56.527808	-75.572737	2896	848.828220668309	246.273125600831	16.6725	1
85057668	56.537567	-75.590527	2898	850.253666103606	246.219769040213	36.763	1
85202630	56.547325	-75.608316	2901	851.680814826841	246.158465608701	66.85425	1
85327017	56.557083	-75.626106	2906	853.109815781385	245.746228350436	54.285	1
85472382	56.566842	-75.643895	2911	854.54054449895	245.646784079929	96.3245	1
85597224	56.5766	-75.661685	2917	855.973085170901	245.540460079362	6.858	1
85743295	56.586358	-75.679474	2923	857.407312973435	245.428090945164	-2.565	1
85868785	56.596117	-75.697264	2928	858.843377719274	245.310726384031	23.5305	1
86078431	56.658217	-75.706651	2927	860.828679713159	245.280055682568	44.5095	1
86288511	56.720317	-75.716039	2925	862.813500975724	245.247594902839	8.19975	1
86499413	56.782417	-75.725427	2921.5	864.797766246226	245.21363722437	23.374	1
86711108	56.844518	-75.734814	2916.5	866.78142236471	245.178491711075	85.7675	1
86923151	56.906618	-75.744202	2908.5	868.764557058538	245.142454935128	13.85475	1
87135395	56.968718	-75.75359	2904.5	870.747117152106	245.221071360843	26.414	1
87347867	57.030818	-75.762977	2904.5	872.729028403223	245.18516777198	40.232	1
87539300	57.092919	-75.772365	2907.5	874.710442790388	245.150221184204	15.322	1
87752413	57.155019	-75.781753	2910.5	876.691242834739	245.116543020227	5.734	1
87965951	57.217119	-75.79114	2907.5	878.671376398473	245.084433043655	94.21875	1
88179514	57.279219	-75.800528	2888.5	880.650973313986	245.054153787544	32.4375	1
88392384	57.34132	-75.809916	2882.5	882.629981467448	245.443669546698	38.53125	1
88605635	57.40342	-75.819303	2886.5	884.60828431357	245.40983038164	67.6875	1
88819392	57.46552	-75.828691	2894.5	886.586032794062	245.377674842699	70.686	1
89033471	57.527621	-75.838079	2890.5	888.56317530066	245.34745141281	28.798	1
89226439	57.590883	-75.847197	2872.5	890.546724164843	245.321810021244	6.28125	1
89441174	57.654145	-75.856316	2858.5	892.529779919569	245.298385150155	64.86	1
89656053	57.717407	-75.865434	2855.5	894.512202224507	245.277341888639	94.5945	1
89870989	57.78067	-75.874553	2861.5	896.494140520403	245.258795361474	130.5655	1
90085706	57.843932	-75.883672	2863.5	898.475478305054	245.242852184229	175.75	1
90299774	57.907194	-75.89279	2859.5	900.456164676189	245.306117155721	114.77625	1
90513233	57.970456	-75.901909	2853	902.436326826174	245.299502870413	40.3965	1
90726341	58.033719	-75.911027	2849	904.415847565799	245.295694305498	100.8	1
90917961	58.096981	-75.920146	2850	906.394810270359	245.294654822791	32.82125	1
91130839	58.160243	-75.929265	2849	908.373164381102	245.296348279992	106.15	1
91343880	58.223505	-75.938383	2843	910.350838128214	245.300723224417	136.0305	1
91556900	58.286768	-75.947502	2836	912.327979543552	245.307706739847	97.291	1
91769816	58.35003	-75.95662	2833	914.304407598661	245.317233894022	48.36	1
91983058	58.413292	-75.965739	2832	916.280269951472	245.329225948596	56.59725	1
92195987	58.476555	-75.974858	2835	918.255516909257	245.343619063134	68.992	1
92387538	58.541022	-75.983742	2845	920.240982205136	245.361808675194	20.829	1
92600413	58.605489	-75.992627	2857	922.225935738227	245.382208247097	10.0215	1
92813229	58.669956	-76.001512	2857	924.210305902041	245.404806868895	14.2825	1
93026011	58.734423	-76.010396	2850	926.194021617227	245.429614433426	50.56	1
93238727	58.79889	-76.019281	2847	928.177207044907	245.481646401305	4.554	1
93451616	58.863357	-76.028166	2846	930.159791083562	245.514122960699	8.91	1
93666421	58.927824	-76.037051	2845	932.14176782273	245.548607176647	28.3855	1
109393763	65.023781	-76.04327	2328.5	872.087628908834	249.549454210572	31.93	1
109199921	64.949781	-76.044794	2352.5	873.362988318347	249.523789773627	60.006	1
93882493	58.992292	-76.045935	2843	933.943926781077	245.585191997096	43.78	1
109027541	64.875781	-76.046319	2366.5	874.642887753733	249.497747903553	77.49	1
108833511	64.801781	-76.047844	2375.5	875.927212645021	249.471374176393	78.642	1
108660917	64.727781	-76.049369	2380.5	877.215939734662	249.444683667706	28.2865	1
108466612	64.653781	-76.050894	2382.5	878.509045825867	249.417659073169	8.932	1
108272182	64.579781	-76.052419	2385.5	879.806507783327	249.436553551996	18.225	1
108099267	64.505781	-76.053944	2388.5	880.473758440306	249.409476513208	22.018	1
94077739	59.056759	-76.05482	2836	933.990806096551	245.623950733488	23.7405	1
107904656	64.431781	-76.055468	2392	881.137375794657	249.381836170896	23.0145	1
107731616	64.357781	-76.056993	2393	881.80736207707	249.244818174449	12.93225	1
107536650	64.283781	-76.058518	2391	882.483592430474	249.216499706719	12	1
107362783	64.209781	-76.060043	2392	883.166049562514	249.187057406518	74.613	1
107166875	64.135781	-76.061568	2399	883.854716092299	249.156398015309	206.96	1
106992536	64.061781	-76.063093	2409	884.549574551974	249.124464514891	190.08	1
94295737	59.121226	-76.063705	2829	934.044576876137	245.66493443499	50.37375	1
106817988	63.987781	-76.064618	2418	885.250607388285	249.091246137384	29.625	1
106621473	63.913781	-76.066143	2429	885.957796964145	249.056784985294	65.207	1
106424718	63.839205	-76.067394	2441	886.646180991738	249.021216594175	126.05475	1
106249625	63.764629	-76.068646	2448	887.340948469901	248.984651232105	114.7585	1
106052519	63.690053	-76.069897	2451	888.041868579761	248.947284231635	87.2625	1
105877287	63.615477	-76.071149	2450	888.749137051748	248.909328780998	93.605	1
105680140	63.540901	-76.0724	2451	889.462523317604	248.871004733067	117.35775	1
94514834	59.185693	-76.07259	2827	934.105229955132	245.7081428433	74.3	1
105504893	63.466325	-76.073652	2461	890.182222507295	248.832507118615	119.83125	1
105307786	63.391749	-76.074903	2473	890.908004317939	248.793995243959	115.296	1
105132632	63.317173	-76.076155	2477	891.640063276951	248.755565891386	36.7675	1
104935736	63.242597	-76.077406	2477	892.378169361449	248.717251974061	58.293	1
104761144	63.168021	-76.078658	2470	893.122516494316	248.679007914792	119.10075	1
104565061	63.093445	-76.079909	2467	893.872874947156	248.640721724406	161.406	1
104390985	63.018869	-76.081161	2484	894.629438036412	248.602213940503	113.364	1
94734490	59.25016	-76.081474	2829	934.172657617988	245.753507036753	39.298	1
104195410	62.944293	-76.082412	2497	895.39197634254	248.489385972404	22.59375	1
104021543	62.869717	-76.083664	2502	896.160682573719	248.451029687522	44.66675	1
103825843	62.795142	-76.084916	2509	896.935424168338	248.411512037634	45.663	1
103651739	62.720842	-76.085792	2515	897.674276584833	248.37094573852	86.49	1
103455761	62.646543	-76.086669	2518	898.419277269073	248.328816434049	37.293	1
103259683	62.572243	-76.087546	2523	899.170321322552	248.285023817539	50.406	1
103085244	62.497944	-76.088422	2523	899.927268941988	248.239560298983	29.481	1
102888589	62.423644	-76.089299	2522	900.690330161481	248.192513847495	60.543	1
102712889	62.349345	-76.090176	2528	901.459364582308	248.144076137927	112.902	1
94954471	59.314627	-76.090359	2830	934.247047004069	245.800866002869	55.476	1
102514845	62.275045	-76.091053	2540	902.234372875048	248.094523949298	46.593	1
102338647	62.200746	-76.091929	2538	903.015214797639	248.04420331215	63.519	1
102162218	62.126446	-76.092806	2540	903.802099768278	247.993489233305	130.758	1
101963495	62.052147	-76.093683	2549	904.594886960968	247.942758633118	75.144	1
101786515	61.977847	-76.09456	2560	905.393577433593	247.892343603871	117.831	1
101587350	61.903548	-76.095436	2569	906.198030550775	247.842504534878	156.24	1
101410404	61.829248	-76.096313	2574	907.008455100885	247.793394811875	17.763	1
101211377	61.754949	-76.09719	2582	907.824709876148	247.745057283379	18.321	1
101034362	61.68065	-76.098067	2588	908.646786453367	247.697412205846	48.081	1
100835004	61.606075	-76.098567	2592	909.438521513679	247.650472658464	52.2665	1
100657743	61.5315	-76.099068	2599	910.236290980356	247.52403439408	12.09375	1
95174771	59.379094	-76.099244	2832	934.328290250047	245.849957040466	6.03	1
100458370	61.456925	-76.099568	2605	911.039871220033	247.476560443673	25.73025	1
100281102	61.38235	-76.100069	2617	911.849450671	247.434107190614	42.8085	1
100081661	61.307775	-76.100569	2636	912.664806119442	247.38615182711	32.395	1
99904388	61.2332	-76.10107	2650	913.486125330211	247.336677386514	9.04875	1
99704958	61.158625	-76.10157	2662	914.313185521763	247.28541406165	21.73525	1
99505515	61.084051	-76.102071	2680	915.146163261926	247.232200982374	9.12	1
99328268	61.009476	-76.102571	2694	915.984857179667	247.177009479856	42.846	1
99128916	60.934901	-76.103072	2716	916.829443245592	247.119957666326	24.86475	1
98951798	60.860326	-76.103572	2728	917.679699580274	247.06130934145	51.25075	1
98774737	60.785751	-76.104073	2726	918.535811920139	247.001453493145	27.5925	1
98575555	60.711176	-76.104573	2727	919.397558855277	246.940874329435	46.452	1
98398505	60.636601	-76.105074	2745	920.2651254435	246.880099405998	24.07125	1
98199316	60.562027	-76.105575	2755	921.138380880385	246.819650584667	41.08	1
98022298	60.487462	-76.105745	2758	921.983771984883	246.760311147326	6.237	1
97823202	60.412898	-76.105915	2758	922.83491233519	246.702133775124	30.888	1
97624147	60.338334	-76.106085	2756	923.691795556453	246.645302401487	30.966	1
97447265	60.263769	-76.106256	2759	924.554516124738	246.589841461782	44.6625	1
97248440	60.189205	-76.106426	2765	925.422832474713	246.535625050538	66.1675	1
97071964	60.114641	-76.106596	2770	926.296839054853	246.482382856829	10.8455	1
96873532	60.040076	-76.106766	2775	927.17652982678	246.358150579281	-5.7855	1
96697133	59.965512	-76.106937	2774	928.061963942361	246.30482227275	20.349	1
96498636	59.890948	-76.107107	2774	928.952935072057	246.250976456944	55.4	1
96322088	59.816383	-76.107277	2786	929.849537404099	246.193286967433	25.6	1
96123431	59.741819	-76.107447	2802	930.751729516965	246.138566887709	67.769	1
95946867	59.667255	-76.107618	2815	931.659604660835	246.082035323973	58.546	1
95770326	59.59269	-76.107788	2827	932.57295810701	246.023494172475	32.562	1
95571746	59.518126	-76.107958	2831	933.491847377141	245.962906169848	12.06	1
95395288	59.443562	-76.108129	2833	934.416365353593	245.900404910374	4.433	1
60800855.1	61.120129	-68.654296	1842	123.479476939867	257.61881785304	171.699	1
60883445	61.119381	-68.673196	1855	125.569356292633	257.586345704107	49.088	1
60966155	61.118633	-68.692097	1870	127.65973182123	257.561716857774	126.228	1
61048976	61.117885	-68.710997	1886	129.75036405009	257.543828755402	158.39	1
61131947	61.117137	-68.729898	1901	131.841456350655	257.531645558771	48.776	1
61215196	61.11639	-68.748798	1912	133.932766865364	257.524198598109	87.516	1
61298583	61.115642	-68.767699	1918	136.024510337487	257.520575151303	125.156	1
61382101	61.114894	-68.786599	1923	138.116446699142	257.519924928558	139.8	1
61465720	61.114146	-68.8055	1934	140.208783366806	257.521462134608	159.372	1
61549374	61.113398	-68.8244	1951	142.301286489895	257.517928710969	70.68	1
61633111	61.112651	-68.843301	1964	144.394160832713	257.523418526715	46.4	1
61716897	61.111903	-68.862201	1970	146.487182481967	257.528856654994	132.881	1
61800757	61.111155	-68.881102	1972	148.58055753584	257.533906982646	155.232	1
61884719	61.110407	-68.900002	1981	150.674054678425	257.53833373129	76.065	1
61968739	61.109659	-68.918903	1992	152.767885534155	257.541997340113	85.56	1
62052814	61.108912	-68.937804	2005	154.861926443647	257.544836555604	120.258	1
62136949	61.10798	-68.956826	2018	156.970292011387	257.546816474078	82.26	1
62221140	61.107048	-68.975849	2033	159.07895131669	257.546810740218	112.385	1
62305460	61.106117	-68.994871	2047	161.187671980229	257.547237698327	132.729	1
62389903	61.105185	-69.013894	2048	163.296676258997	257.546765928611	47.008	1
62474436	61.104253	-69.032917	2043	165.405843097981	257.54388094132	54	1
62559011	61.103322	-69.051939	2054	167.515051897695	257.541199070884	82.88	1
62643540	61.10239	-69.070962	2085	169.624525702282	257.537219899321	113.284	1
62728040	61.101458	-69.089984	2120	171.734033751471	257.531778553388	37.296	1
62812688	61.100527	-69.109007	2133	173.843788568561	257.524718043973	45.526	1
62897458	61.099595	-69.12803	2133	175.953681658056	257.51591626029	21.12	1
62982270	61.098663	-69.147052	2136	178.063593810962	257.505306933394	173.886	1
63067098	61.097732	-69.166075	2149	180.173738431826	257.492884946335	161.69	1
63151969	61.0968	-69.185097	2170	182.283896685464	257.478833804505	197.925	1
63236708	61.095868	-69.20412	2182	184.394282385275	257.462934044032	82.703	1
63321391	61.094937	-69.223143	2179	186.504777390309	257.445443063082	62.064	1
63406043	61.096647	-69.24186	2176	188.572613833445	257.428500435295	142.76	1
63490714	61.098358	-69.260577	2185	190.640773938582	257.41029132774	181.03	1
63592357	61.100069	-69.279295	2208	192.709361329879	257.390772818033	122.694	1
63677159	61.10178	-69.298012	2235	194.778144237663	257.369834506105	12.012	1
63761985	61.103491	-69.31673	2252	196.847334586768	257.34728033957	15.408	1
63863731	61.105202	-69.335447	2262	198.916701390222	257.322832177448	51.36	1
63948537	61.106913	-69.354164	2268	200.95640559957	257.296118215628	52.948	1
64033331	61.108624	-69.372882	2275	202.898525266329	257.266675768935	157.136	1
64135267	61.110335	-69.391599	2287	204.843335114543	257.233958250043	172.956	1
64220435	61.112046	-69.410317	2299	206.790966373641	257.197326525654	198.09	1
64322721	61.113757	-69.429034	2308	208.740698028523	257.156068808183	169.575	1
64408040	61.115468	-69.447751	2313	210.687569908612	257.109394534721	25.5	1
64493473	61.117179	-69.466469	2319	212.636539746522	257.056449681631	37.736	1
64596079	61.11889	-69.485186	2330	214.587948937541	256.996341208737	119.144	1
64681642	61.120601	-69.503904	2350	216.541939417759	256.928135187099	34.263	1
64767205	61.120875	-69.522703	2363	218.524279977992	256.849510834143	26.649	1
64852691	61.121149	-69.541503	2370	220.508726836272	256.572638721383	74.025	1
64938209	61.121423	-69.560303	2372	222.495120884939	256.453388908127	53.848	1
65040895	61.121698	-69.579103	2391	224.483398691456	256.322152497851	19.504	1
65126491	61.121972	-69.597903	2406	226.473533929459	256.178718350722	92.856	1
65212005	61.122246	-69.616702	2421	228.465360341285	256.023175356482	39.432	1
65297465	61.12252	-69.635502	2436.5	230.459043568177	255.85592245978	53.848	1
65382878	61.122795	-69.654302	2452.5	232.454421195858	255.677754598445	80.75	1
65468249	61.123069	-69.673102	2465.5	234.451472363173	255.489843710689	93.5	1
65553702	61.123343	-69.691902	2474.5	236.450143553398	255.293744566983	15.725	1
65639185	61.123617	-69.710701	2480.5	238.450287431677	255.0913692967	47.175	1
65741747	61.123892	-69.729501	2491.5	240.452066830452	254.884885005309	-4.25	1
65827277	61.124166	-69.748301	2501.5	242.455358932531	254.676690616663	99.258	1
65912690	61.12444	-69.767101	2510.5	244.460115845754	254.469276124032	93.72	1
65998108	61.124715	-69.785901	2521.5	246.46629125424	254.265119306537	34.08	1
66083508	61.125295	-69.804662	2532.5	248.466494798218	254.067253252551	5.1	1
66168855	61.125876	-69.823424	2544.5	250.468209059841	253.877103001414	41.552	1
66254142	61.126457	-69.842186	2557.5	252.471304060417	253.696505312626	59.22	1
66356418	61.127038	-69.860947	2565.5	254.475640004255	253.526948029708	29.61	1
66441519	61.127619	-69.879709	2571.5	256.481399585218	253.369519826809	22.366	1
66526462	61.1282	-69.898471	2577.5	258.488445034187	253.224966097929	101.04	1
66611415	61.128781	-69.917232	2581.5	260.496639244422	253.152410859115	104.16	1
66696485	61.129361	-69.935994	2587.5	262.506177907401	253.035093234925	73.744	1
66781476	61.129942	-69.954756	2598.5	264.51690599074	252.930343057479	-17.138	1
66883406	61.130523	-69.973517	2610.5	266.52869869844	252.837755215491	30.858	1
66968305	61.131104	-69.992279	2619.5	268.541744747603	252.756791056146	59.072	1
67053162	61.131685	-70.011041	2626	270.555911054337	252.686850925432	76.544	1
67138022	61.132266	-70.029802	2631	272.57106504829	252.627292951135	61.835	1
67223053	61.132847	-70.048564	2636	274.587398016574	252.577454068332	71.622	1
67308227	61.133428	-70.067326	2639	276.604778850608	252.536688898375	81.774	1
67393458	61.132584	-70.086316	2643	278.660848073491	252.502186241636	81.576	1
67478722	61.131741	-70.105307	2647	280.717829919251	252.475711333977	46.443	1
67564037	61.130898	-70.124297	2650	282.775500040381	252.45667551275	56.17	1
67649486	61.130055	-70.143288	2652	284.834057073386	252.444504071401	98.569	1
67735071	61.129212	-70.162279	2653	286.893376306583	252.438630161397	102.408	1
67821047	61.128369	-70.181269	2652	288.953333327834	252.438474661752	90.354	1
67907317	61.127526	-70.20026	2651	291.014128450053	252.443430419026	143.724	1
67993741	61.126683	-70.21925	2647	293.075530014799	252.452844591739	135.27	1
68080441	61.12584	-70.238241	2643	295.137739364467	252.46600796951	128.876	1
68167323	61.124997	-70.257232	2640	297.20063377854	252.469612176218	124.124	1
68254326	61.124154	-70.276222	2638	299.264090777985	252.490644269404	108.942	1
68341557	61.123311	-70.295213	2634.5	301.328313130516	252.512425825858	135.137	1
68428989	61.122468	-70.314203	2631.5	303.393070776599	252.534141020835	130.4	1
68516518	61.121625	-70.333194	2628.5	305.458567361782	252.555009462649	127.281	1
68604076	61.120782	-70.352185	2625.5	307.524681830912	252.574331669108	126.962	1
68621580	61.098307	-70.369512	2622.5	309.589696103465	252.57317026684	130.473	1
68639087	61.075832	-70.386839	2619.5	311.655185407863	252.569846313655	107.73	1
68656595	61.053358	-70.404167	2618.5	313.721233766506	252.563432001391	126.8	1
68674108	61.030883	-70.421494	2618.5	315.787625817606	252.552772649474	107.067	1
68691620	61.008409	-70.438822	2618.5	317.854546209589	252.536411047321	146.766	1
68709135	60.985934	-70.456149	2618.5	319.921780724529	252.512504649319	109.344	1
68726650	60.963459	-70.473477	2618.5	321.989523032787	252.47884941322	115.258	1
68744169	60.940985	-70.490804	2616.5	324.057534155625	252.432507201087	108.81	1
68761691	60.91851	-70.508132	2608.5	326.126034070861	252.370814798335	131.704	1
68779214	60.896036	-70.525459	2604.5	328.19477593896	252.294571137811	155.115	1
68796737	60.873561	-70.542787	2601.5	330.263980437348	252.202528666704	115.02	1
68831799	60.851086	-70.560114	2599.5	332.333410189203	252.096831969746	139.664	1
68849323	60.828612	-70.577442	2596.5	334.403260002926	251.981689598274	140.822	1
68866847	60.806137	-70.594769	2593.5	336.473319697104	251.862700214137	129.833	1
68884369	60.783663	-70.612097	2593.5	338.543775597079	251.745755633031	117.096	1
68866826	60.752088	-70.627961	2597.5	340.538872157888	251.59369640901	116.156	1
68849281	60.720514	-70.643825	2599.5	342.535517556499	251.455875842203	118.08	1
68831736	60.688939	-70.659689	2600.5	344.533692173691	251.33626992548	122.889	1
68831725	60.657365	-70.675553	2599.5	346.533340694799	251.23589819944	106.296	1
68814179	60.625791	-70.691417	2598.5	348.534436125641	251.153723368249	154.875	1
68796632	60.594216	-70.707281	2595	350.53695259949	251.087624921053	126.684	1
68779087	60.562642	-70.723145	2591	352.540836730567	251.035118157938	122.01	1
68779077	60.531067	-70.739009	2590	354.546073732718	250.993758091246	157.626	1
68761533	60.499493	-70.754873	2587	356.552611412982	250.961363202963	131.67	1
68743990	60.467919	-70.770737	2586	358.560426992119	250.936064425558	107.264	1
68743979	60.436344	-70.786601	2587	360.569498694686	250.894840346308	130.2	1
68726440	60.40477	-70.802465	2588	362.579775988744	250.877007592439	126.721	1
68708903	60.373195	-70.818329	2588	364.591248359683	250.862059564176	121.536	1
68708892	60.341621	-70.834193	2587	366.603866303607	250.849132200982	148.896	1
68691357	60.310047	-70.850058	2588	368.617717582061	250.837526169063	169.176	1
68638782	60.266853	-70.862984	2590	370.437688534445	250.810085127011	223.872	1
68568710	60.223659	-70.87591	2593	372.261465671126	250.784801162415	124.95	1
68516162	60.180465	-70.888837	2597	374.089084637617	250.760847019385	114.325	1
68463620	60.137272	-70.901763	2601	375.920252172026	250.737554624541	115.6	1
68411104	60.094078	-70.914689	2606	377.755027625821	250.714403460687	79.05	1
68341152	60.050884	-70.927616	2610	379.527271350412	250.691008958772	92.868	1
68288777	60.00769	-70.940542	2611	381.198829775981	250.66710506117	128.652	1
68236470	59.964497	-70.953468	2616	382.875664034608	250.642541403317	110.334	1
68184258	59.921303	-70.966395	2620	384.557811871793	250.617264399078	115.446	1
68132087	59.878109	-70.979321	2618	386.24496561261	250.591305896895	120.414	1
68062591	59.834915	-70.992247	2618	387.937153539957	250.564769068795	130.662	1
68010549	59.791722	-71.005174	2622.5	389.634398195286	250.537809737825	159.698	1
67958636	59.748528	-71.0181	2625.5	391.336415077883	250.510611851124	126.392	1
67906783	59.705334	-71.031026	2634.5	393.043229321293	250.483379583376	146.804	1
67854986	59.662141	-71.043953	2639.5	394.754866351225	250.456315289466	135.248	1
67854976	59.631866	-71.060105	2631.5	396.730352659325	250.444592352669	97.584	1
67854965	59.601592	-71.076257	2629.5	398.707307374821	250.251311293415	93.732	1
67837704	59.571318	-71.092409	2633.5	400.685707026284	250.229756965543	125.965	1
67837694	59.541044	-71.108561	2636.5	402.665521682971	250.208690943186	111.02	1
67837683	59.51077	-71.124713	2636.5	404.646721982862	250.188019224829	156.282	1
67837673	59.480496	-71.140865	2637.5	406.629279119815	250.167603256749	121.695	1
67837662	59.450222	-71.157017	2635.5	408.613164831069	250.147265534153	129.381	1
67837652	59.419948	-71.17317	2633.5	410.598460041128	250.126796595936	120.558	1
67837641	59.389674	-71.189322	2631.5	412.584920174686	250.105960801719	150.378	1
67820389	59.3594	-71.205474	2629.5	414.572627234145	250.084507018589	150.804	1
67820378	59.329126	-71.221626	2627	416.561555011389	250.062175556653	128.652	1
67820368	59.298852	-71.237778	2626	418.551677783713	250.038707322147	84.774	1
67820357	59.268578	-71.25393	2625	420.542970303082	250.0138522699	147.475	1
67820347	59.238304	-71.270082	2625	422.535407785676	249.987377157779	173.825	1
67820336	59.20803	-71.286235	2629	424.529074201492	249.959072304392	145.35	1
67906606	59.204963	-71.305213	2627	426.609334085642	249.956936598898	96.05	1
67993029	59.201896	-71.324192	2620	428.689980199421	249.953827847506	154.76	1
68079730	59.19883	-71.343171	2613	430.770892133233	249.949760052083	198.856	1
68166612	59.195763	-71.362149	2609	432.851973449966	249.944756816983	139.072	1
68253615	59.192697	-71.381128	2605	434.933420992735	249.938854418422	120.555	1
68340846	59.18963	-71.400107	2602	437.015138354849	249.932088671175	72.333	1
68428278	59.186564	-71.419086	2601	439.097105926578	249.924499301707	101.52	1
68515807	59.183497	-71.438064	2598	441.179227210652	249.91611614686	83.556	1
68603365	59.180431	-71.457043	2596	443.261699773592	249.90696411397	81.868	1
68690953	59.177364	-71.476022	2596	445.344427138746	249.897050642731	113.518	1
68778589	59.174298	-71.495001	2597.5	447.427390247085	249.886372437916	102.724	1
68866255	59.171231	-71.513979	2598.5	449.510492528039	249.772063666711	92.199	1
68936376	59.168165	-71.532958	2595.5	451.593932228345	249.769961453026	112.828	1
69024007	59.165098	-71.551937	2591.5	453.677612789508	249.766321214768	148.68	1
69111657	59.162032	-71.570916	2588.5	455.761515669412	249.840871414214	95.34	1
69234295	59.171817	-71.589577	2581.5	457.714430911939	249.849485925861	117.88	1
69356861	59.181603	-71.608238	2572.5	459.668860422497	249.858941224524	133.878	1
69479525	59.191389	-71.626899	2566.5	461.624791565359	249.869460493742	127.444	1
69602163	59.201174	-71.645561	2563.5	463.582320505489	249.88131331994	106.766	1
69707285	59.21096	-71.664222	2566.5	465.541195553487	249.894829364889	102.366	1
69830140	59.220746	-71.682883	2569.5	467.501513535415	249.910386912707	92.637	1
69953318	59.230532	-71.701544	2570.5	469.463255509029	249.928425365781	128.472	1
70077244	59.240317	-71.720206	2567.5	471.426518773432	249.949438562147	157.728	1
70201305	59.250103	-71.738867	2558.5	473.391053078807	249.973979900075	132.175	1
70307690	59.259889	-71.757528	2551.5	475.356956339052	250.002628998395	80.325	1
70431756	59.269675	-71.776189	2543.5	477.324210786632	250.035974441819	132.06	1
70555706	59.27946	-71.794851	2535.5	479.292914762407	250.074559913368	165.288	1
70679535	59.289246	-71.813512	2527.5	481.262819369028	250.118825506019	135.359	1
70785677	59.299032	-71.832173	2517.5	483.234023519584	250.168988977928	167.384	1
70909579	59.308818	-71.850835	2505.5	485.206619714135	250.224936347772	233.26	1
70909568	59.277204	-71.866881	2501.5	487.166742120927	250.092222362569	147.576	1
70909558	59.245591	-71.882927	2503.5	489.128160151999	249.938941369865	144.91	1
70909548	59.213978	-71.898973	2508.5	491.090857062783	249.769553738642	119.11	1
70909537	59.182365	-71.915019	2518.5	493.054809901786	249.592598352178	197.398	1
70909527	59.150752	-71.931065	2528.5	495.019996070301	249.419605887716	78.192	1
70891806	59.119139	-71.947111	2537.5	496.986393316007	249.262348738312	82.27	1
70891796	59.087526	-71.963157	2542.5	498.953979726694	249.129591047389	59.458	1
70891785	59.055913	-71.979203	2545.5	500.922733724118	249.025106579315	225.246	1
70891775	59.0243	-71.995249	2550.5	502.892634057971	248.947720600443	7.395	1
70891764	58.992687	-72.011295	2554.5	504.863659799981	248.893804567139	72.376	1
70891754	58.961074	-72.027341	2551.5	506.835790338125	248.857378930085	32.338	1
70891743	58.929461	-72.043387	2539.5	508.809005370958	248.833800045769	98.988	1
70891733	58.897848	-72.059433	2540.5	510.78328490206	248.819113920582	95.922	1
70891723	58.866235	-72.075479	2551.5	512.758609234578	248.81046624528	11.414	1
70891712	58.834622	-72.091525	2558.5	514.734958965898	248.805926170811	132	1
70891702	58.800949	-72.107292	2552.5	516.697511080773	248.803249887986	107.36	1
70873985	58.767277	-72.123059	2543.5	518.66130094352	248.802688627072	145.309	1
70873975	58.733604	-72.138827	2551.5	520.626429782752	248.803505380078	221.695	1
70856263	58.699932	-72.154594	2581.5	522.59264369471	248.805075297043	0	1
70856253	58.666259	-72.170362	2598.5	524.560153114967	248.806786872548	63.51	1
70856242	58.632587	-72.186129	2610.5	526.528704732557	248.807986343863	-8.74	1
70838532	58.598914	-72.201896	2615.5	528.498401454238	248.807967358917	31.464	1
70838521	58.565242	-72.217664	2614.5	530.469315098535	248.800386300493	71.94	1
70838511	58.531569	-72.233431	2613.5	532.441224746236	248.79427577554	56.244	1
70838500	58.497897	-72.249199	2614.5	534.414310668635	248.784518160307	168.78	1
70820792	58.464224	-72.264966	2615.5	536.388352940948	248.770546556136	40.455	1
70820781	58.430552	-72.280733	2617.5	538.363424049939	248.751987451121	75.516	1
70820771	58.396879	-72.296501	2619.5	540.339628862073	248.728700440647	131.502	1
70803064	58.363207	-72.312268	2622.5	542.316716282172	248.700805939965	61.486	1
70803053	58.329535	-72.328036	2631.5	544.294891486258	248.668675179771	124.271	1
70803043	58.29733	-72.344152	2651.5	546.299298175593	248.634275754562	-8.64	1
70803032	58.265125	-72.360269	2666.5	548.304580951322	248.59725335402	10.8	1
70803022	58.23292	-72.376386	2669	550.310616401033	248.558469354244	82.321	1
70820708	58.200715	-72.392503	2668	552.317389128153	248.51881021628	8.6	1
70820698	58.16851	-72.40862	2672	554.324734500426	248.479133264327	24.024	1
70820687	58.136305	-72.424737	2680	556.331947068001	248.440225611836	-5.577	1
70820677	58.1041	-72.440854	2686	558.339862447982	248.402777875424	43.228	1
70820666	58.071895	-72.45697	2691	560.348358507411	248.367371003641	34.587	1
70820656	58.03969	-72.473087	2694	562.357635801869	248.334476349926	72.846	1
70820645	58.007485	-72.489204	2696	564.367572560476	248.304458835904	162.732	1
70838333	57.97528	-72.505321	2697	566.378154735111	248.27758841689	55.675	1
70838323	57.943075	-72.521438	2698	568.389368472666	248.254051173867	59.36	1
70838312	57.91087	-72.537555	2700	570.401200111769	248.077405275042	72.756	1
70838302	57.878665	-72.553672	2701	572.413636179571	248.051626467847	50.337	1
70838291	57.846461	-72.569789	2702	574.426654504329	248.02913009681	78.07	1
70838281	57.812375	-72.585695	2701	576.434448503552	248.007493861284	102.124	1
70838270	57.778289	-72.601601	2701	578.442985159051	247.988957719316	115.775	1
70838260	57.744203	-72.617508	2702	580.452356186943	247.973337834077	129.247	1
70838249	57.710117	-72.633414	2704	582.462332401476	247.960395322877	108.78	1
70838239	57.676031	-72.64932	2707	584.4730059776	247.949845804489	73.5	1
70838228	57.641945	-72.665227	2711	586.484469095496	247.941358152491	74.34	1
70838218	57.607859	-72.681133	2711	588.496493461825	247.934552882829	120.672	1
70838207	57.573773	-72.697039	2706	590.458012634165	247.929017602933	141.203	1
70838197	57.539687	-72.712946	2703	592.34347440281	247.924310327977	72.314	1
70838186	57.505601	-72.728852	2702	594.230642451279	247.919964355952	63.536	1
70838176	57.471515	-72.744758	2703	596.119602647129	247.91551106889	123.31	1
70838165	57.437429	-72.760665	2702	598.010441041922	247.910488244151	115.092	1
70838155	57.403343	-72.776571	2701	599.902912815259	247.904449494421	114.258	1
70838145	57.369257	-72.792477	2701	601.797104620753	247.896988163469	90.688	1
70838134	57.335172	-72.808384	2704	603.693099102858	247.887745515626	106.912	1
60767838	61.116666	-68.65	1838	123.02252878444	257.625600818867	151.4	1
67785895	59.2	-71.283333	2629	424.279907751413	249.950789279861	121.9	1
72386823	55.666666	-73.816666	2758	720.155931541098	245.981216881884	106.2	1
109329167	65.016666	-76.033333	2325.5	871.290331698776	249.565388865692	37.5	1
26367912	15	-75	3459	484.982073628187	241.8786	43	1
26367912.1	15	-75	3459	484.982073628187	241.8786	43	1
40550320	-10.5	-77.033333	2173	238.737493367765	253.698291092632	71	1
19086208	-13.165	-74.105277	647	23.6495180246335	265.258612199389	220	1
31510382	-8.050833	-76.000277	2388.5	264.994649824159	251.94771375685	69	1
153140241.1	77.35	-80.366666	4086.5	1249.49122686366	234.316465993635	23	1
66589179.1	39.703333	-77.316944	3792	815.50548570795	235.780640659891	29.5	1
24691749	-9.541666	-75.088333	2438.5	176.364363011459	255.154750856004	102	1
24691749.1	-9.541666	-75.088333	2438.5	176.364363011459	255.154750856004	101	1
24691749.2	-9.541666	-75.088333	2438.5	176.364363011459	255.154750856004	104	1
22565887	2	-75	2943	378.601130010052	246.604934095533	77	1
15589875	-12.433333	-73.6	772.5	54.2619630963322	265.969511339287	324	1
178669054.2	0	-90	2758	1249.30391261843	241.294325	85	1
284421	4.8	-70.23	49.5	47.2614585903515	273.633991964767	272	1
66623202	39.731	-77.317	3792	815.545418277727	235.775721707931	27.3	1
66827194	39.616666	-77.366666	3791	820.928744703091	235.702231438876	32	1
26123612	14.956666	-74.970638	3459	481.518042060084	241.878619754074	43.7	1
26123612.1	14.956666	-74.970638	3459	481.518042060084	241.878619754074	40	1
26339161	15.113388	-74.988722	3460	484.527677816515	241.878607754395	44.9	1
26339161.1	15.113388	-74.988722	3460	484.527677816515	241.878607754395	42	1
26367912.2	14.996361	-74.999972	3459	484.954983327605	241.878600000013	39.1	1
26367912.3	14.996361	-74.999972	3459	484.954983327605	241.878600000013	40	1
26396686	14.886472	-75.011194	3459	485.45833816698	241.878625212696	42.1	1
26396686.1	14.886472	-75.011194	3459	485.45833816698	241.878625212696	39	1
26612929	15.0435	-75.029361	3460	488.447332668914	241.878611664147	39.8	1
26612929.1	15.0435	-75.029361	3460	488.447332668914	241.878611664147	42	1
31510382.1	-8.05	-76	2388.5	265.015975580215	251.947578903873	62	1
31510382.2	-8.05	-76	2388.5	265.015975580215	251.947578903873	68	1
263816246	-148.998	-81.653	642	432.550039868685	260.173961106624	121	1
263816246.1	-148.998	-81.653	642	432.550039868685	260.173961106624	145	1
263816246.2	-148.998	-81.653	642	432.550039868685	260.173961106624	116	1
239478707.1	-120	-80	1502	568.089959024653	259.688120338023	101	1
332083684	137.78333	-68.01667	2039	168.290132575526	261.667337779998	83	1
322485397	134.71667	-70.01667	2539.5	397.925098806726	248.239355885678	230	1
202694150	95.516666	-69.733333	2741.5	339.490514132783	251.800357227307	230	1
203948323	96.6	-72.133333	3261	593.166590942023	244.682359418177	89	1
204153438	97.483333	-74.083333	3503	803.57394259008	239.95650167204	53	1
190285413	93.816666	-75.766666	3731.5	908.385080623961	237.706061705937	53	1
220077726	106.8	-78.45	3486	1213.5347252219	235.474411424492	25	1
328167344	136.94	-68.94	2353.5	275.962897459324	252.012532315707	213	1
10704132	17.29	-72.3	2409.5	231.743349205892	261.808870273658	94	1
338939398	158.87	-70.68	1883	89.3214436453219	261.366958715976	241	1
336892625	158.29	-71.18	2084	142.03781640812	257.766466267674	153	1
328167345	136.9352	-68.93963	2353.5	275.97011030871	252.01105911066	213	1
328926690	139.014716	-69.37471	2367.5	298.329119762515	253.641819002138	45	1
324618013	135.453516	-69.58295	2438.5	360.932004427315	251.306243043969	218	1
328268869	140.57565	-70.02911	2316.5	328.217411450683	249.703117851276	142	1
326171718	141.383333	-70.8711	2271.5	372.552289217578	249.627094703975	117	1
325794521	143.082	-71.40836	2188.5	392.354445250087	248.406453793932	96	1
326471747	145.2631	-71.7117	2167	375.444113372556	248.453091368341	112	1
331586645	156.368216	-72.27791	2199	278.278798283271	251.488802850303	113	1
325862535	147.2874	-72.3019	2202	396.139872578727	249.003007852402	94	1
330114134	154.48415	-72.38861	2156.5	330.507222142138	251.076503582515	100	1
328361102	152.357166	-72.52086	2197	387.011480123112	250.349156999386	82	1
326601996	150.173883	-72.62833	2166.5	407.254773862859	249.33416272409	84	1
330934278	159.07575	-72.77058	2333	235.89023537689	251.388742586889	87	1
322578880	155.299833	-74.43891	2054	223.784576126259	250.737749340373	251	1
334277899	158.536933	-71.887	2201.5	201.466646018147	253.724483357337	129	1
234393116	167.98333	-85.33333	2016	740.042672059741	251.402018591111	35	1
338919756	158.862483	-70.68403	1885	89.8438183789711	261.362751388576	241	1
336899718	158.282916	-71.17703	2083	141.981719344683	257.79942082456	153	1
311240249	167.18181	-77.82522	0.5	42.9108576362874	262.95706811848	329.04	1
311168260	166.96915	-77.8269	-3	38.5772801728211	263.132601116919	383.88	1
311276070	167.41153	-77.83015	4.5	47.3704496705961	262.733563022921	493.56	1
310973152	166.79613	-77.8475	-19	33.9296537158753	263.227417431869	393.02	1
311107903	167.37703	-77.85502	2.5	45.3629973040107	262.744402465793	301.62	1
310923655	166.81882	-77.85632	-20	33.8549867464565	263.224080344067	237.64	1
311059145	167.4032	-77.86478	1.5	45.3671188847206	262.709044304442	365.6	1
310911217	167.01395	-77.86758	-8	37.1903803911947	263.13405814359	265.06	1
310734852	166.94843	-77.89006	-12	34.7194662921451	263.193941060233	301.62	1
310696589	166.84448	-77.89183	-23	32.44422853808	263.233843446903	292.48	1
310709357	166.88501	-77.89211	-18	33.282531536074	263.221929550348	383.88	1
310424247	166.60111	-77.9192	-20	26.015392802721	263.263625059436	118.82	1
310683738	167.38557	-77.91949	-3.5	42.4178834167871	262.675029352917	338.18	1
310515802	166.94437	-77.92325	-14	32.8714305212525	263.218805764066	219.36	1
310923465	168.43225	-77.9306	0.5	65.0674108577221	262.460881777185	237.64	1
310306037	166.71553	-77.94116	-17	27.2312095525283	263.260665168098	210.22	1
310120142	166.69875	-77.96689	-16	25.6556191714728	263.26164038106	73.12	1
310186852	166.97054	-77.96986	-12	31.3799000240662	263.229069235771	255.92	1
310279568	167.36998	-77.97601	-4	39.9552569528813	262.657866160424	356.46	1
309957927	166.6835	-77.98756	-13	24.4740867220922	263.261841446689	100.54	1
309916882	167.10971	-78.01504	-5	33.0887981044851	263.125289200885	146.24	1
309861982	166.98816	-78.01694	-6	30.2954179636624	263.224518311096	265.06	1
309556595	167.00044	-78.05775	-2	29.8935637403107	263.20260016958	210.22	1
309146348	166.82098	-78.10307	2	25.6715215807254	263.241183773853	-45.7	1
309217527	167.01529	-78.10381	3	30.1246800322409	263.157263615158	228.5	1
490653	0	-70.416666	64.5	89.6498576460742	270.036871750056	371	1
692553	-2.466666	-70.5	61	74.9645440666229	269.133995997267	451	1
1291655	0	-70.75	72	57.0956504744582	270.075836971085	253	1
1816104	0.216666	-70.933333	61	35.4066296008836	270.178548997395	244	1
6338354	-0.716666	-72.216666	818	63.6438864273059	265.325719827544	320	1
3689220	1.180833	-71.514166	615	36.5843603034444	265.279143829733	60	1
692554	-2.463333	-70.5	61	74.952501962217	269.135073987314	480	1
10757880	-0.458333	-73.096944	1989.5	159.993296031093	254.299726495243	120	1
10757880.1	-0.458333	-73.096944	1989.5	159.993296031093	254.299726495243	200	1
10150507	-1.1275	-72.977777	1729.5	149.302580360893	255.292217172563	50	1
10150507.1	-1.1275	-72.977777	1729.5	149.302580360893	255.292217172563	60	1
6562584	-1.259444	-72.260833	842	74.2818893121898	265.070935203884	450	1
6693257	-1.705833	-72.284444	913	81.6397188313047	264.974300400336	410	1
37515229	45.98	-71.2	2557.5	290.410425351813	251.500961143337	116	1
37515229.1	45.98	-71.2	2557.5	290.410425351813	251.500961143337	86	1
37515229.2	45.98	-71.2	2557.5	290.410425351813	251.500961143337	92	1
178669054.3	0	-90	2758	1249.30391261843	241.294325	63.7	1
15062493	40.1565	-69.015333	661.5	15.8962505948532	270.993218124508	190.862973	1
15138274	40.205333	-69.0185	712.5	17.8056609650533	270.975005372983	204.132357	1
15236423	40.2585	-69.022666	779.5	19.7887132437348	270.965539460764	223.629388	1
15040944	40.120833	-69.023	630.5	14.4185065866159	271.017303492651	176.6198	1
15312947	40.307333	-69.025	848.5	21.3350253619758	270.961715725591	223.848374	1
15008743	40.082833	-69.025666	601.5	12.8958514523627	271.057298099661	194.513121	1
15400574	40.360166	-69.026333	922.5	22.987023913783	270.960089700348	293.318789	1
15477540	40.405166	-69.0285	951.5	24.5212912231668	270.959672517602	195.248138	1
14976694	40.0525	-69.029722	568.5	11.6839139741388	271.105223000886	27.078322	1
15565776	40.455666	-69.031666	967.5	26.0463115016981	270.959549505813	274.030606	1
15642991	40.503	-69.035	976.5	27.1702476560663	270.959528804617	230.631317	1
15731346	40.550333	-69.0385	984.5	28.3966559224901	270.95952633745	220.907496	1
15819930	40.596666	-69.044	991.5	29.6833884762776	270.959474208874	208.354799	1
15897532	40.6435	-69.0455	997.5	30.4334901818363	270.959200553113	225.143759	1
15986233	40.6915	-69.049333	1003	31.5193899305174	270.958085386273	281.655621	1
16063999	40.716833	-69.059	1006	32.9033858754954	270.956431921469	239.25728	1
16164408	40.748	-69.070166	1010	34.5426834029407	270.952681147142	211.615849	1
16265156	40.781666	-69.079444	1013	36.046877166524	270.945897934231	274.683201	1
16354753	40.807333	-69.092166	1017	37.7658685411675	270.93571679927	185.523655	1
16455704	40.837166	-69.103	1023	39.3749074215569	270.919455312498	217.068214	1
16580611	40.876	-69.118333	1032	41.5995223152628	270.885479607448	235.316984	1
16694884	40.9105	-69.131	1041	43.4889710058755	270.841161654747	180.354605	1
16797934	40.939166	-69.1425	1048	44.6330440972737	270.790134503057	197.930179	1
16901275	40.969666	-69.1545	1056	45.7965728625111	270.721327418537	184.830284	1
16993461	40.997666	-69.165833	1062	46.8992626695209	270.643497290612	220.670261	1
17097593	41.027166	-69.177833	1071	48.0960195043584	270.547079811106	182.643767	1
17213842	41.059333	-69.1915	1086	49.443162546098	270.425833147299	53.870671	1
17331322	41.090666	-69.204833	1118	50.7940775579868	270.296116669724	266.514861	1
17449836	41.121166	-69.217833	1179	51.9019715299914	270.162978540343	140.303573	1
17556709	41.149833	-69.231333	1219	52.4213551685796	270.033347182448	108.44855	1
17663717	41.183	-69.243	1243	53.2327645774267	269.890982065868	133.720063	1
17782849	41.219666	-69.254	1258	54.2464039609939	269.739780988497	192.525692	1
17903240	41.257333	-69.265666	1268	55.323687935594	269.591332381447	144.22437	1
18037019	41.289666	-69.2815	1276	56.1386324277931	269.469804106783	208.077452	1
18159070	41.3225	-69.296	1285	57.0701561396377	269.357259989083	134.237527	1
18293651	41.3595	-69.31	1293	58.2288893512524	269.179007557866	98.696639	1
18416123	41.3975	-69.323166	1302	59.4905956188995	269.064539585046	131.172515	1
18551159	41.435166	-69.3365	1317	60.7810969174619	268.958780456555	128.46412	1
18674161	41.469666	-69.351	1332	61.9793885743488	268.864670883687	118.334974	1
18810045	41.5085	-69.365	1344	63.3957415378616	268.764405987054	119.544312	1
18934040	41.5425	-69.378	1349	64.6663160274037	268.676780231496	88.529369	1
19058384	41.567333	-69.394	1359	65.6087092265947	268.598480761928	134.904962	1
19182799	41.596833	-69.408833	1379	66.777651737549	268.508709746677	133.588391	1
19319881	41.625333	-69.4255	1405	67.9392836790136	268.408661390722	133.418898	1
19456994	41.651833	-69.442333	1448	69.0637903385029	268.301846062634	149.003772	1
19581562	41.683	-69.457666	1494	70.4010753708504	268.183282556632	125.592584	1
19705872	41.713	-69.473166	1500	71.7296268879238	268.055812903507	118.415743	1
19842852	41.749166	-69.487833	1490	73.3184435837178	267.912100184429	111.807015	1
19968291	41.783166	-69.501	1487	74.8265105009175	267.771329329552	75.654141	1
20106640	41.819333	-69.515833	1488	76.4669979241639	267.605100311551	108.662634	1
20232608	41.851166	-69.529333	1492	77.9394451242821	267.444894135512	159.402538	1
20345999	41.872833	-69.543333	1501	79.0537335769748	267.287175945453	149.126782	1
20510071	41.922666	-69.559166	1523	81.3028921386055	267.051381405692	95.748813	1
20636472	41.9575	-69.573833	1535	82.9747010970008	266.839343315985	113.690032	1
20775784	41.997833	-69.586833	1544	84.8284537297749	266.624003774119	108.832133	1
20902753	42.03	-69.601	1550	86.418576541261	266.399597758762	132.500275	1
21042552	42.065	-69.616	1558	88.1544998078692	266.148583010565	94.232585	1
21183525	42.100666	-69.629833	1566	89.8959894621177	265.90082498841	135.190435	1
21312418	42.134833	-69.644333	1573	91.6150071016124	265.637426796998	142.357118	1
21454696	42.167333	-69.660166	1585.5	93.3299305009709	264.80122467127	88.770265	1
21584596	42.2025	-69.6745	1597.5	95.1079353246522	264.503326577121	114.414737	1
21728288	42.2365	-69.6895	1608.5	96.8780383240073	264.191668192462	104.656436	1
21872545	42.271333	-69.704833	1619.5	98.703090314755	263.869458997713	128.294658	1
22004216	42.3105	-69.7165	1631.5	100.559460448382	263.600720918382	123.33945	1
22149401	42.3485	-69.730166	1643.5	102.453793512917	263.299953182605	110.763364	1
22281766	42.383	-69.7445	1653.5	103.99468179706	262.995223260612	108.064804	1
22427113	42.415833	-69.760666	1665.5	105.412060317146	262.665348763921	119.234026	1
22559767	42.4475	-69.775833	1681.5	106.797145935478	262.359085033087	108.94536	1
22720381	42.4835	-69.792166	1701.5	108.384081169776	262.032905293213	103.019118	1
22855286	42.517	-69.805833	1709.5	109.857687106187	261.760862213053	125.17336	1
22977087	42.544166	-69.8205	1714.5	111.122051216111	261.491573650424	103.054616	1
23126479	42.5795	-69.835166	1719.5	112.713151146277	261.217105952259	103.474463	1
23276416	42.6155	-69.849666	1717.5	114.341655831017	260.952971737758	84.879377	1
23426559	42.659	-69.863833	1717.5	116.25991115908	260.689268109422	142.996352	1
23562584	42.691388	-69.876944	1735.5	117.749823722818	260.466781113086	149.95169	1
23698415	42.7295	-69.888166	1749	119.42291061965	260.263638685148	139.885248	1
23847816	42.770166	-69.903166	1760	121.284468187379	260.01865368534	181.257297	1
23997308	42.805666	-69.917833	1775	122.957584557906	259.795932057237	160.562779	1
24134179	42.8435	-69.931	1789	124.69144461531	259.591970065267	124.173026	1
24271647	42.881	-69.9445	1816	126.429731033217	259.391859497045	163.388546	1
24423478	42.916666	-69.96	1851	128.162827168778	259.184517561614	97.092907	1
24561761	42.9365	-69.977666	1878	129.386941617038	259.000236703768	77.371189	1
24742284	42.983333	-69.993333	1899	131.562561253096	258.541546122244	83.196865	1
24881441	43.0305	-70.0035	1905	133.593383818133	258.390542697038	48.827143	1
25021240	43.080666	-70.012	1915	135.684939430156	258.246003506585	92.297869	1
25161893	43.130833	-70.021166	1923	137.796838337524	258.101617877367	33.330421	1
25303302	43.1595	-70.036166	1923	139.306160126045	257.971757470189	35.406087	1
25445378	43.18935	-70.050533	1924	140.848647105617	257.849109488558	4.325316	1
25587477	43.219666	-70.0645	1947	142.403673639957	257.733642659042	23.346244	1
25715571	43.247333	-70.079	1980	143.888998239993	257.626780022081	57.074551	1
25858034	43.276666	-70.093333	1993	145.437470996366	257.524529203896	59.166588	1
26000489	43.304	-70.1085	1994	146.951999608035	257.429501854751	60.621245	1
26128976	43.3315	-70.123333	1998	148.469930882254	257.342837007184	195.66112	1
26272603	43.3585	-70.138166	2007	149.978801084288	257.264468069628	74.483709	1
26416465	43.3855	-70.153333	2013	151.508950130764	257.193068866575	37.847484	1
26546214	43.408666	-70.168666	2019	152.918868705143	257.133333349536	64.552238	1
26675997	43.430833	-70.184166	2025	154.310060232504	257.081562814258	145.613468	1
26864337	43.4825	-70.198666	2037	156.706303905313	257.015334004454	30.306615	1
26820791	43.453666	-70.2005	2033	155.768536958854	257.035161881285	91.75031	1
27082586	43.505833	-70.230166	2046	158.817744384618	256.963698530264	12.497398	1
27228267	43.532166	-70.245166	2055	160.369149063827	256.937665219629	13.44684	1
27359258	43.557833	-70.260333	2066	161.911997722173	256.917753023086	22.41184	1
27505036	43.5815	-70.275833	2080	163.408066947318	256.903647404794	34.806674	1
27636386	43.6065	-70.290333	2087.5	164.91312017722	256.893362103651	57.06173	1
27767771	43.632166	-70.305166	2093.5	166.462336252335	256.886179214934	9.579753	1
27913924	43.658666	-70.320166	2099.5	168.053989053671	256.881454115884	20.335283	1
28045783	43.684666	-70.3345	2104.5	169.603685658385	256.875201095278	39.835507	1
28222004	43.7185	-70.353666	2114.5	171.652558844974	256.874379876483	7.409667	1
28354404	43.743	-70.3685	2121.5	173.187961911885	256.874615756991	129.958808	1
28501818	43.768166	-70.383333	2128.5	174.751515433262	256.874562154278	69.092187	1
28619857	43.7935	-70.397166	2135.5	176.277028920414	256.873482715152	53.386771	1
28767558	43.819166	-70.412166	2146.5	177.875864633996	256.871862189501	66.112388	1
28900787	43.845	-70.427333	2154.5	179.493963556659	256.868727655443	29.084718	1
29049115	43.8725	-70.442833	2157.5	181.189417919641	256.862638653894	59.796011	1
29182390	43.898666	-70.4575	2161.5	182.803191487776	256.853359880976	49.774003	1
29330314	43.925666	-70.472333	2165.5	184.457386359881	256.838578121117	8.325143	1
29463885	43.952666	-70.4865	2168.5	186.081019452699	256.815291754072	67.428875	1
29612761	43.983333	-70.501	2173.5	187.845574782012	256.777476872161	84.229866	1
29746978	44.01	-70.515166	2179.5	189.465007057015	256.72834142828	28.187044	1
29896231	44.039333	-70.529666	2180.5	191.192309743279	256.65703879993	110.958629	1
30030703	44.066666	-70.545	2178.5	192.902852415282	256.567768339349	107.43093	1
30180138	44.090833	-70.560666	2176.5	194.533370852797	256.467137541151	144.684329	1
30314712	44.111833	-70.576333	2174.5	196.06712017766	256.362044839328	82.944601	1
30434792	44.127833	-70.591666	2172.5	197.42786207689	256.268866540524	56.881265	1
30570197	44.1503	-70.607	2172.5	199.001227147013	256.138779956387	19.765387	1
30705490	44.172833	-70.6225	2181	200.590723179662	256.003963653958	53.398292	1
30855662	44.196166	-70.638333	2197	202.229194049492	255.866007792701	75.100517	1
30960900	44.211	-70.651666	2209	203.460670276195	255.779221470208	18.96478	1
31111357	44.235	-70.669666	2225	205.254705974815	255.651424446496	134.216172	1
31247032	44.255666	-70.6855	2239	206.824211021808	255.552442448955	56.475235	1
31458399	44.283	-70.711	2254	209.177275363773	255.440879904917	80.93012	1
31503722	44.277	-70.72	2255	209.526344739968	255.469355314165	41.717032	1
31579249	44.263	-70.737	2256	210.116169563356	255.528399076551	15.30918	1
31639615	44.247	-70.754	2257	210.662224890501	255.587227618686	36.861153	1
31745153	44.241	-70.772	2261	211.592032431583	255.60451107021	2.269962	1
31835639	44.235	-70.79	2266	212.537181820266	255.618311126977	32.172387	1
31941104	44.226	-70.811	2272	213.599146583726	255.63589180618	21.23305	1
32046391	44.224	-70.827	2278	214.566952135503	255.6321906914	79.542939	1
32136530	44.219	-70.844	2282	215.521734314021	255.633704639751	96.72053	1
32241303	44.214	-70.863	2287	216.621127908894	255.630138655809	39.774843	1
32315933	44.206	-70.88	2287	217.515062507054	255.631661650262	49.543546	1
32420372	44.2	-70.898	2289	218.541801918262	255.616077927259	121.124136	1
32509922	44.194	-70.916	2293	219.582007655193	255.599075065696	104.410246	1
32614173	44.189	-70.934	2298	220.664622365314	255.573770860767	175.683651	1
32703109	44.185	-70.951	2304	221.719743685171	255.38620424326	121.609025	1
32806628	44.177	-70.97	2310	222.812788775781	255.328747895423	143.17565	1
32895234	44.174	-70.987	2314.5	223.920405248031	255.260065557529	87.339329	1
32998549	44.169	-71.005	2321.5	225.053981774728	255.179745054808	69.136964	1
33086961	44.162	-71.023	2328.5	226.144712518902	255.090503985273	55.188547	1
33189806	44.156	-71.041	2332.5	227.27591918067	254.986515672368	81.253152	1
33277838	44.15	-71.059	2329.5	228.419576195726	254.868712029258	131.943192	1
33365883	44.144	-71.077	2328.5	229.575496933498	254.73653315388	129.121366	1
33468805	44.138	-71.095	2338.5	230.743496527665	254.589647218573	177.222021	1
33557101	44.132	-71.113	2351.5	231.923391929213	254.428009336218	53.882376	1
33645124	44.125	-71.13	2362.5	233.013220079885	254.263726635496	89.285294	1
33747615	44.12	-71.149	2369.5	234.318147332278	254.062048489741	128.163387	1
33850209	44.115	-71.167	2372.5	235.558711104028	253.85836497426	176.98548	1
33938136	44.108	-71.184	2371.5	236.681327633343	253.658289690285	142.508	1
34026037	44.103	-71.202	2374.5	237.943163715868	253.434725692754	129.197943	1
34128515	44.097	-71.22	2381.5	239.189971615344	253.205129922315	110.945355	1
34216314	44.091	-71.238	2391.5	240.447458389595	252.97093792395	42.588414	1
34318727	44.084	-71.256	2402.5	241.69034672475	252.735774480329	37.609717	1
34406526	44.08	-71.274	2407.5	243.018725929566	252.498796022668	53.675971	1
34509098	44.073	-71.292	2411.5	244.282330530642	252.268115760411	109.569535	1
34597165	44.067	-71.309	2412.5	245.500294311244	252.055344684627	102.372702	1
34699998	44.061	-71.328	2414.5	246.889297574995	251.825908509666	87.865589	1
34787999	44.056	-71.345	2419.5	248.150064662956	251.630199585279	95.329057	1
34875867	44.05	-71.363	2425.5	249.477091761985	251.435224624214	142.196781	1
34978234	44.044	-71.381	2433.5	250.81352906718	251.2534508365	172.02739	1
35065880	44.038	-71.399	2439.5	252.159226443781	251.085676554977	165.363488	1
35168307	44.032	-71.417	2445.5	253.23155181724	250.932319226305	180.143817	1
35256227	44.026	-71.435	2450.5	254.265820519381	250.793456563353	160.863916	1
35358844	44.02	-71.453	2453.5	255.312088983275	250.663699908717	148.379376	1
35446809	44.013	-71.471	2459.5	256.342350670252	250.557062759063	132.87428	1
35534954	44.007	-71.489	2468.5	257.412350148605	250.462566534916	82.180472	1
35623267	44	-71.506	2476.5	258.396827901445	250.38540153337	92.81363	1
35726472	43.994	-71.524	2487.5	259.489401261048	250.313605193308	51.896939	1
35815033	43.988	-71.542	2498.5	260.593252789811	250.252225060026	151.509548	1
35918268	43.982	-71.56	2506.5	261.70823929687	250.200419152249	176.41969	1
36006565	43.975	-71.578	2510.5	262.807388490754	250.158117917186	14.743447	1
36109480	43.969	-71.596	2510.5	263.944390391788	250.123090849117	28.458962	1
36197656	43.963	-71.614	2510.5	265.092103412689	250.095365384339	39.219576	1
36285861	43.957	-71.631	2513.5	266.176988904558	250.075541943065	69.731786	1
36388780	43.951	-71.649	2521.5	267.345188776999	250.001716023337	148.065625	1
36476955	43.945	-71.667	2532.5	268.519939230038	250.001639138183	231.979145	1
36594488	43.941	-71.687	2547.5	269.899753243714	250.003778796469	97.504615	1
36667942	43.932	-71.703	2554.5	270.861120334341	250.012771772158	67.597075	1
36770535	43.926	-71.721	2559.5	272.059179229843	250.022399068054	34.938685	1
36858201	43.921	-71.739	2560.5	273.292578673261	250.033676723869	48.342049	1
36945670	43.913	-71.757	2560.5	274.459463104585	250.048975795255	119.888047	1
37047744	43.908	-71.775	2562.5	275.712037727021	250.063497956733	84.944548	1
37135292	43.902	-71.793	2565.5	276.948693873591	250.079459634506	65.751817	1
37222842	43.895	-71.81	2569.5	278.088076543981	250.095421165559	74.847322	1
37310279	43.883	-71.828	2572.5	279.19056654032	250.114007580786	77.236117	1
37412392	43.883	-71.846	2577.5	280.598760386791	250.125517525523	111.433005	1
37514705	43.877	-71.864	2585.5	281.867700203572	250.138543854036	131.983057	1
37602473	43.871	-71.882	2599.5	283.145542473148	250.149733595077	133.877764	1
37704906	43.864	-71.9	2616.5	284.408093288586	250.159195654041	172.403889	1
37792920	43.857	-71.918	2626.5	285.67962878765	250.166562846785	112.85408	1
37895860	43.851	-71.936	2633.5	286.983778854089	250.17183717167	51.63475	1
37984216	43.846	-71.954	2635.5	288.319950699699	250.17536069808	51.212927	1
38072908	43.839	-71.971	2637.5	289.535832150081	250.177880463295	59.417688	1
38176661	43.833	-71.989	2643.5	290.86451998486	250.179353477899	88.477717	1
38265736	43.826	-72.007	2652.5	292.17816958146	250.179851366752	116.30767	1
38369852	43.82	-72.025	2663.5	293.52308571468	250.17982193547	119.40982	1
38459161	43.815	-72.043	2671.5	294.898694484483	250.179015240471	113.514828	1
38563160	43.807	-72.061	2675.5	296.213756029284	250.177468252133	136.178771	1
38652266	43.801	-72.079	2676.5	297.582113382342	250.17508576446	159.080789	1
38756509	43.794	-72.097	2677.5	298.935660034754	250.171829276383	130.686068	1
38845983	43.788	-72.115	2681.5	300.319162175915	250.167302823399	118.513972	1
38950418	43.782	-72.133	2688.5	301.710005697148	250.16153979143	114.774232	1
39039944	43.776	-72.15	2697.5	303.022923661429	250.155002581729	134.054052	1
39129544	43.768	-72.168	2706.5	304.384268340208	250.147307385552	97.172782	1
39219232	43.76	-72.186	2711.5	305.753257477598	250.138551665728	108.65041	1
39323892	43.754	-72.204	2715.5	307.172714519443	250.12818529868	122.964735	1
39413648	43.747	-72.222	2719.5	308.577700763823	250.117174392506	112.200738	1
39518271	43.74	-72.24	2721.5	309.989731775756	250.105303958503	94.209869	1
39607898	43.734	-72.258	2723.5	311.429737836056	250.092180267193	63.367255	1
39712387	43.728	-72.276	2730.5	312.876309830517	250.073278305031	73.666373	1
39801788	43.72	-72.294	2743.5	314.287873474673	250.057316791649	93.720211	1
39890855	43.713	-72.311	2764.5	315.638852694421	250.040481619514	116.50242	1
39979704	43.706	-72.329	2782.5	317.084237324755	250.020491106265	70.124658	1
40083424	43.7	-72.347	2796.5	318.556433288294	249.997481395575	0.479179	1
40172445	43.693	-72.365	2803.5	320.014570646912	249.971979427259	1.19562	1
40276361	43.686	-72.383	2806.5	321.479023399463	249.942821864643	16.731894	1
40365425	43.679	-72.401	2810.5	322.949705092736	249.909287270353	42.307789	1
40469247	43.672	-72.419	2817.5	324.426530478924	249.870574790857	60.439467	1
40558248	43.666	-72.436	2824.5	325.838875988028	249.82810383491	131.347441	1
40647148	43.66	-72.454	2831.5	327.346828531461	249.776155408333	105.299645	1
40751110	43.654	-72.472	2834.5	328.860414191138	249.716279238184	146.15388	1
40840330	43.648	-72.49	2834.5	330.379555160837	249.647450409414	45.591138	1
40944283	43.642	-72.508	2840.5	331.904174777188	249.568621559454	28.38416	1
41033152	43.635	-72.526	2853.5	333.415216913567	249.479338423756	9.771457	1
41136660	43.629	-72.544	2869.5	334.950696778656	249.377402975843	10.232254	1
41225429	43.621	-72.561	2879.5	336.362001406947	249.270549384492	15.453482	1
41329065	43.613	-72.58	2882.5	337.962982642737	249.135988407594	48.020747	1
41417793	43.605	-72.598	2882.5	339.47759809385	248.993878768561	73.945006	1
41506659	43.597	-72.615	2883.5	340.905015813416	248.846247340392	78.224781	1
41595668	43.59	-72.633	2888.5	342.448609098152	248.674627886581	8.552562	1
41684758	43.581	-72.651	2896.5	343.961199985491	248.489324919972	24.451836	1
41788549	43.574	-72.669	2908.5	345.515270619813	248.289016118085	60.728771	1
41877402	43.567	-72.686	2917.5	346.980669896736	248.088162614115	108.006561	1
41966250	43.56	-72.704	2925.5	348.54446497052	247.864236156783	11.138474	1
42055062	43.55	-72.722	2931.5	350.060394620617	247.281990790429	25.347418	1
42158723	43.543	-72.74	2936.5	351.634242395047	247.038659628677	26.1508	1
42247617	43.535	-72.758	2940.5	353.195500277826	246.674003836421	92.762649	1
42351321	43.528	-72.776	2941.5	354.778892055757	246.433453524616	105.252708	1
42440146	43.521	-72.794	2943.5	356.36690047358	246.200144557239	179.165424	1
42543833	43.513	-72.812	2950.5	357.942487683826	245.976675785498	181.0143	1
42617952	43.505	-72.829	2955.5	359.427392475118	245.77624214372	53.458571	1
42721820	43.497	-72.847	2960.5	361.012171691765	245.576433558474	55.537273	1
42825800	43.491	-72.866	2969.5	362.730621701893	245.380026048267	44.858217	1
42915073	43.483	-72.883	2980.5	364.228514433762	245.218774902595	131.440532	1
42989578	43.472	-72.9	2993.5	365.681315110601	245.071502448248	25.349141	1
43093910	43.467	-72.919	3008.5	367.429324734512	244.920554348698	66.237349	1
43198348	43.46	-72.937	3022.5	369.052485138989	244.792835360465	13.937664	1
43288169	43.452	-72.955	3032.5	370.663677286766	244.679033960534	8.517855	1
43378204	43.444	-72.972	3040.5	372.182180780907	244.583497810938	29.000701	1
43483234	43.437	-72.99	3046.5	373.817490116901	244.493647281719	58.466991	1
43573261	43.429	-73.008	3049.5	375.440999695425	244.415096137179	29.138665	1
43663333	43.421	-73.026	3051.5	377.068605957218	244.346604156836	40.408179	1
43768625	43.414	-73.044	3053.5	378.715766881601	244.286941914037	77.03515	1
43858957	43.404	-73.062	3057.5	380.320495191538	244.236105400785	155.944762	1
43949169	43.397	-73.08	3063.5	381.975474466401	244.191742894422	101.686398	1
44039316	43.389	-73.097	3068.5	383.520783826868	244.155994523385	51.22115	1
44144486	43.38	-73.115	3072.5	385.152837986119	244.123657029196	110.52258	1
44234541	43.373	-73.133	3077.5	386.818851937293	244.095695915618	100.574979	1
44324552	43.364	-73.151	3080.5	388.458646844426	244.072328277194	83.261024	1
44429636	43.357	-73.168	3081.5	390.033089898825	244.053205944258	142.311898	1
44519799	43.348	-73.186	3086.5	391.680269446595	244.036225148621	136.389514	1
44610019	43.34	-73.204	3092.5	393.345825460256	244.013988103454	81.373527	1
44715245	43.332	-73.222	3096	395.014935480685	244.003488383392	105.139949	1
44805551	43.327	-73.24	3099	396.730670869967	243.993876267443	77.825133	1
44896142	43.316	-73.258	3101	398.36363643573	243.986396227945	83.047794	1
45002130	43.307	-73.276	3108	400.028969964972	243.979561508355	58.607642	1
45093268	43.299	-73.294	3116	401.71194640768	243.973457325075	87.551764	1
45199901	43.292	-73.312	3127	403.412228372003	243.964543859613	97.510899	1
45291516	43.283	-73.33	3138	405.087854993925	243.961165653998	55.039941	1
45383145	43.276	-73.348	3146	406.794483632041	243.95804001008	58.343002	1
45474666	43.267	-73.365	3155	408.376367072692	243.955672211195	54.53336	1
45581490	43.26	-73.383	3166	410.089052685882	243.953464457827	35.307699	1
45673085	43.252	-73.401	3175	411.791179482535	243.951784656437	24.152423	1
45764736	43.244	-73.419	3181	413.496397447006	243.95054219133	22.244528	1
45856305	43.235	-73.436	3184	415.0904445608	243.949764421066	47.325341	1
45963067	43.227	-73.454	3187	416.801695457188	243.949207222298	58.897766	1
46054575	43.219	-73.472	3190	418.515924334651	243.948918237487	56.032072	1
46161311	43.211	-73.49	3195	420.233094198608	243.94886008563	67.108919	1
46252663	43.203	-73.508	3199	421.953168594574	243.948924785382	104.434729	1
46343714	43.195	-73.526	3200	423.676111599736	243.949359944313	68.750523	1
46449642	43.187	-73.544	3200	425.401887814636	243.950169747471	103.46097	1
46540605	43.179	-73.561	3202	427.028715238996	243.951433942206	108.667775	1
46631553	43.17	-73.579	3205	428.747333014178	243.953488270641	82.760703	1
46737639	43.163	-73.597	3208	430.493895795297	243.9562489742	78.219	1
46828668	43.154	-73.615	3210	432.218115266503	243.960133957897	61.787071	1
46919948	43.146	-73.633	3214	433.95751982887	243.964911769667	4.712237	1
47026542	43.138	-73.651	3220	435.69955659558	243.970600979628	85.115286	1
47117898	43.13	-73.669	3227	437.44419358971	243.975659432293	70.708962	1
47209266	43.121	-73.686	3235	439.076786616873	243.98193769064	28.007408	1
47315809	43.113	-73.704	3243.5	440.826508802563	243.988323698208	44.941624	1
47407167	43.105	-73.722	3254.5	442.578738806149	243.994386742442	11.979117	1
47513854	43.099	-73.74	3265.5	444.357158646779	243.99925880472	33.080285	1
47605346	43.092	-73.758	3271.5	446.125932198842	244.003355145922	13.811861	1
47712278	43.085	-73.776	3276.5	447.896968006346	244.006131284654	33.893177	1
47804073	43.078	-73.794	3279.5	449.670238946405	244.007309079814	59.020877	1
47911072	43.07	-73.812	3283.5	451.434170196471	244.006901125217	50.938972	1
48002715	43.063	-73.829	3286.5	453.108625014971	244.004411668136	40.140353	1
48109602	43.057	-73.848	3286.5	455.003197184213	243.998590871334	80.147099	1
48201255	43.05	-73.865	3286.5	456.681687602668	243.991295974203	112.527363	1
48308156	43.043	-73.883	3288.5	458.465653414336	243.980524057701	91.527306	1
48399595	43.036	-73.901	3293.5	460.25170080022	243.966370223478	66.559394	1
48506073	43.03	-73.919	3300.5	462.050912323275	243.887700151582	58.650526	1
48597249	43.022	-73.937	3307.5	463.829942555482	243.855572126957	57.535959	1
48704030	43.016	-73.955	3316.5	465.633051595673	243.816858600361	67.8624	1
48795984	43.009	-73.972	3324.5	467.323153099224	243.774467396032	70.935235	1
48903617	43.002	-73.99	3330.5	469.119095707188	243.722255975665	22.726316	1
48995902	42.997	-74.008	3333.5	470.938492419379	243.661376313772	25.690344	1
49103673	42.988	-74.026	3333.5	472.716781911231	243.592591281312	46.435627	1
49211733	42.986	-74.045	3333.5	474.675845419247	243.507581747661	63.426588	1
49304993	42.976	-74.063	3336.5	476.447498461883	243.418384574678	83.051006	1
49414622	42.964	-74.081	3343.5	478.200493885044	243.221308681866	103.177405	1
49493300	42.951	-74.099	3349.5	479.945664120795	243.097071411147	115.209237	1
49603633	42.94	-74.117	3354.5	481.714146541203	242.96040221008	58.120304	1
49698444	42.928	-74.135	3357	483.474745896986	242.812122139917	84.617137	1
49777673	42.91	-74.152	3359	485.072112617999	242.662898271958	84.722633	1
49856909	42.895	-74.17	3364	486.807809196094	242.494198355076	71.997599	1
49967860	42.884	-74.188	3372	488.586345629782	242.315876877188	30.803688	1
50063128	42.877	-74.205	3380	490.301770479293	242.140211037682	56.725868	1
50142510	42.861	-74.223	3387	492.035141665225	241.950196103133	51.47841	1
50253537	42.849	-74.242	3392	493.915766060736	241.745335467574	36.220048	1
50332823	42.834	-74.259	3396	495.559189924338	241.561695280581	41.926486	1
50428120	42.815	-74.277	3401	497.272139301282	241.368956919636	50.134668	1
50507639	42.798	-74.294	3407	498.902020585281	241.190023549399	49.187276	1
50603278	42.782	-74.313	3415	500.755311699709	240.99560949199	56.058216	1
50683143	42.758	-74.331	3420	502.431104583251	240.820241375563	54.416294	1
50794886	42.748	-74.35	3420	504.346502593264	240.643145030096	41.359473	1
50858651	42.729	-74.367	3418	505.96946421662	240.495658926033	68.193711	1
50954502	42.716	-74.385	3420	507.75606186677	240.34949967999	74.23787	1
51066366	42.705	-74.403	3426	509.563001428039	240.214751736555	30.720186	1
51146249	42.69	-74.421	3432	511.335944003317	240.092287493084	27.025871	1
51242113	42.674	-74.439	3437	513.10245999086	239.897054214866	34.738965	1
51338018	42.66	-74.457	3441	514.889235379384	239.809481258917	67.121632	1
51433943	42.648	-74.475	3445	516.695815052251	239.731516617686	46.448098	1
51545677	42.637	-74.494	3447.5	518.619401233142	239.561915375725	33.693913	1
51641485	42.621	-74.512	3451.5	520.395405324084	239.515697564672	54.61497	1
51721308	42.603	-74.529	3457.5	522.05032793225	239.478252059406	49.569762	1
51816979	42.593	-74.548	3460.5	523.988789279078	239.441089274125	51.097968	1
51928590	42.581	-74.567	3460.5	525.912165824323	239.409735545576	66.06966	1
52024236	42.567	-74.585	3460.5	527.714169172998	239.384907231679	80.12842	1
52119900	42.551	-74.603	3461.5	529.501721838723	239.36424981284	62.855995	1
52199639	42.536	-74.62	3465.5	531.193049793827	239.347902733698	69.037847	1
52311383	42.524	-74.639	3473.5	533.124606162491	239.33218229389	53.756851	1
52407251	42.51	-74.658	3480.5	535.041902900254	239.319759594134	34.289652	1
52519194	42.499	-74.677	3486.5	536.985386565996	239.309560716799	40.0307	1
52599257	42.484	-74.695	3489.5	538.791757074784	239.302761784073	52.967376	1
52695381	42.468	-74.713	3490.5	540.592353308758	239.29800750646	47.888995	1
52791647	42.456	-74.731	3491.5	542.426440153457	239.294352004829	51.572763	1
52888067	42.438	-74.749	3492.5	544.215678169083	239.293039688134	51.216814	1
52968412	42.422	-74.766	3494.5	545.915448654279	239.292795071716	49.419988	1
53080897	42.408	-74.785	3498	547.847167048019	239.290300910364	40.281434	1
53177390	42.396	-74.804	3505	549.795984553641	239.292151858001	43.291888	1
53257837	42.378	-74.821	3509	551.486646503535	239.294952399822	42.837897	1
53354434	42.362	-74.839	3509	553.301901297659	239.297607468065	52.122868	1
53451097	42.347	-74.857	3507	555.12658171882	239.30003317831	56.681203	1
53547818	42.332	-74.875	3506	556.953175664454	239.302159993374	60.229967	1
53644592	42.318	-74.894	3507	558.896571590222	239.303890715042	54.611523	1
53757673	42.316	-74.911	3510	560.712712672863	239.304754088675	36.840591	1
53822279	42.28	-74.929	3514	562.39445677513	239.306127248908	46.50144	1
53919067	42.264	-74.947	3520	564.221884680343	239.30661667784	53.144503	1
54015763	42.248	-74.965	3526	566.051246099395	239.306875960155	40.189834	1
54112477	42.234	-74.983	3532	567.896362834412	239.306990646025	40.285005	1
54193075	42.217	-75.001	3536	569.722547382705	239.307034302776	37.014188	1
54305924	42.204	-75.019	3540	571.57793418696	239.307038455895	37.519789	1
54386518	42.187	-75.036	3542.5	573.299759867569	239.307037020763	34.621453	1
54467168	42.167	-75.054	3542.5	575.111535363204	239.307029216258	52.170339	1
54580077	42.151	-75.073	3541.5	577.060276807704	239.307017285449	56.087717	1
54644610	42.13	-75.089	3541.5	578.653425277171	239.307081219918	52.039616	1
54741420	42.112	-75.107	3541.5	580.484815671098	239.30724899664	52.755205	1
54838305	42.097	-75.125	3545.5	582.337496308528	239.30759574893	46.375471	1
54919068	42.078	-75.143	3549.5	584.166303699255	239.308320469672	37.959602	1
55015907	42.061	-75.161	3552.5	586.009811195105	239.309459155997	38.721776	1
55112740	42.05	-75.179	3553.5	587.892688532794	239.310899366989	44.800993	1
55225809	42.04	-75.197	3553.5	589.782947597144	239.312743380816	48.08966	1
55322763	42.029	-75.214	3554.5	591.559561280751	239.314976221188	49.979647	1
55419729	42.012	-75.232	3557.5	593.409090698576	239.318176096599	53.044401	1
55500562	41.996	-75.25	3561.5	595.266430274188	239.32178419055	47.67381	1
55597485	41.979	-75.268	3564.5	597.11938683391	239.32585540111	42.376919	1
55694196	41.962	-75.286	3565.5	598.974058716934	239.330160345737	46.917879	1
55790859	41.944	-75.304	3565	600.824537525759	239.334658473142	48.559266	1
55871321	41.929	-75.321	3566	602.5855335374	239.338525223673	49.934969	1
55967816	41.91	-75.34	3569	604.542410072929	239.330429554269	49.934969	1
56080408	41.9	-75.358	3573	606.443939143398	239.329595567342	46.99589	1
56160740	41.874	-75.376	3575	608.255526336977	239.329951646439	50.087085	1
56224947	41.85	-75.392	3577	609.863128817076	239.295998599625	50.502745	1
56305144	41.827	-75.409	3579	611.587510165057	239.287169801835	46.449353	1
56401328	41.806	-75.428	3581	613.543118168063	239.273260808768	43.629358	1
56481497	41.787	-75.444	3582	615.184425184318	239.258734235999	43.191046	1
56561761	41.767	-75.462	3583	617.040196749022	239.238404876205	49.005487	1
56658379	41.75	-75.48	3585	618.913768344173	239.213115374222	45.464259	1
56755224	41.731	-75.498	3587	620.778317519451	239.183216468032	41.927013	1
56852235	41.72	-75.516	3589	622.686300054514	239.146481780747	43.347794	1
56933217	41.697	-75.534	3592	624.53314657803	239.105778260482	43.503873	1
57030551	41.68	-75.551	3595	626.303471343869	239.060553284534	45.565668	1
57111736	41.659	-75.569	3598	628.164263012866	239.006363703829	43.066511	1
57209330	41.639	-75.586	3601	629.922548610307	238.948397587379	42.735317	1
57290759	41.623	-75.603	3603	631.702305217793	238.882860306284	42.785514	1
57372191	41.6	-75.621	3606	633.55840639187	238.806691256348	48.516652	1
57486058	41.581	-75.64	3608.5	635.545374536337	238.616859439478	44.915703	1
57567289	41.561	-75.658	3612.5	637.419689586099	238.514700913118	41.559936	1
57648501	41.537	-75.676	3616.5	639.276719747436	238.406230158478	41.280901	1
57746013	41.519	-75.694	3620.5	641.163910227285	238.291196010736	38.554295	1
57827394	41.497	-75.711	3622.5	642.924394606897	238.178806295689	38.938638	1
57925224	41.479	-75.729	3625.5	644.814580866527	238.055945364145	33.413888	1
58023252	41.46	-75.747	3628.5	646.701627975944	237.931316807754	36.040562	1
58105132	41.44	-75.764	3632.5	648.47597833699	237.813520916631	39.356551	1
58203411	41.421	-75.782	3637.5	650.365982956378	237.689767025683	40.498127	1
58285370	41.397	-75.799	3641.5	652.125776358702	237.575957570558	42.928015	1
58383832	41.38	-75.818	3644.5	654.137315164009	237.452120065316	39.815745	1
58466001	41.36	-75.835	3648.5	655.917667728531	237.346769129818	39.588702	1
58564732	41.339	-75.853	3653.5	657.805065913494	237.241300224669	32.235525	1
58663598	41.322	-75.872	3658.5	659.820653136197	237.137098697497	30.285874	1
58746105	41.303	-75.889	3661.5	661.609419499335	237.051313099839	41.691257	1
58845068	41.282	-75.907	3664.5	663.50122145983	236.833786239859	35.678095	1
58944035	41.264	-75.925	3665.5	665.40669728175	236.707338912246	32.428854	1
59042862	41.244	-75.943	3665.5	667.305411535697	236.662189248169	39.661091	1
59125183	41.227	-75.959	3666.5	668.997422642001	236.626917978337	42.493012	1
59207568	41.201	-75.977	3668	670.8753043972	236.593028394012	51.511062	1
59306544	41.181	-75.996	3673	672.888347557713	236.56173950714	37.305778	1
59389100	41.155	-76.013	3678	674.659824216834	236.53873976364	33.519787	1
59471730	41.133	-76.03	3683	676.448207090775	236.51878618206	34.905736	1
59554440	41.109	-76.048	3689	678.340783831268	236.501130454912	37.062311	1
59670364	41.093	-76.067	3693	680.374487805041	236.484740768633	38.819775	1
59753287	41.069	-76.085	3695	682.270088846224	236.473068256092	36.146412	1
59852888	41.049	-76.103	3695	684.181630509859	236.463329617866	34.937345	1
59935911	41.028	-76.12	3696	685.980712824188	236.45638129045	38.59552	1
60035481	41.005	-76.138	3698	687.884399511269	236.451012557678	43.87972	1
60134823	40.987	-76.156	3699	689.806777595211	236.446726726022	39.647381	1
60217502	40.965	-76.174	3699	691.716665953057	236.444541114824	40.886926	1
60316673	40.95	-76.191	3698	693.541102505728	236.436082164885	42.285826	1
60415708	40.932	-76.21	3697	695.577028740454	236.437571779629	42.243874	1
60514786	40.913	-76.228	3697	697.500424557421	236.440114027188	41.676954	1
60597408	40.892	-76.245	3699	699.308112034092	236.443610007271	37.484	1
60712964	40.876	-76.264	3701	701.353746598861	236.447174180142	38.147685	1
60811997	40.856	-76.282	3704	703.277264205972	236.451669489474	37.280373	1
60894607	40.832	-76.3	3708	705.189511156605	236.456828272573	35.800573	1
60993910	40.812	-76.318	3713	707.115508301302	236.461485047281	39.427872	1
61093369	40.794	-76.336	3716	709.048697201333	236.465702489253	33.519594	1
61176501	40.77	-76.353	3717	710.854469968789	236.469108308208	35.871847	1
61276533	40.747	-76.371	3716	712.775093519731	236.47259560676	36.161681	1
61376745	40.73	-76.389	3716	714.71446469423	236.474976766996	35.915131	1
61477094	40.714	-76.408	3720	716.768097180258	236.476666185859	31.919803	1
61577512	40.691	-76.426	3725.5	718.692204080588	236.477738200078	37.013714	1
61678025	40.669	-76.444	3728.5	720.62041251698	236.47828035083	36.485402	1
61761857	40.646	-76.462	3729.5	722.547100703986	236.478510831896	36.044768	1
61862577	40.631	-76.48	3729.5	724.496714724706	236.478578294519	37.761288	1
61963398	40.612	-76.498	3730.5	726.436319753495	236.478594964233	36.432346	1
62081126	40.592	-76.517	3730.5	728.484864419398	236.478594982816	37.040686	1
62165279	40.575	-76.534	3729.5	730.320990849234	236.478584181511	36.739168	1
62266383	40.552	-76.552	3730.5	732.253147492103	236.478556002605	35.798601	1
62350783	40.533	-76.569	3733.5	734.085966329105	236.478511195021	37.125896	1
62469110	40.513	-76.588	3737.5	736.138538418877	236.478463957776	36.298953	1
62553686	40.492	-76.605	3741.5	737.968287232797	236.478453208893	31.261428	1
62655108	40.475	-76.623	3743.5	739.919422639127	236.47855002826	34.95793	1
62756557	40.455	-76.642	3743.5	741.974875703263	236.478897549656	34.984133	1
62858225	40.437	-76.659	3742.5	743.814547605893	236.479490832316	35.202659	1
62960003	40.415	-76.678	3742.5	745.867223858014	236.480605985348	33.68886	1
63061788	40.396	-76.696	3742.5	747.817079485388	236.481998552387	35.062493	1
63163621	40.378	-76.714	3742.5	749.770035278939	236.483683922796	36.714118	1
63248341	40.354	-76.731	3742.5	751.59973651481	236.486041639901	34.984133	1
63349949	40.334	-76.749	3745.5	753.550081516457	236.488423146985	38.741156	1
63451539	40.311	-76.767	3750.5	755.49491595946	236.491215446522	30.355719	1
63570115	40.293	-76.786	3752.5	757.562162902868	236.49359802702	31.047859	1
63654891	40.269	-76.804	3755.5	759.506952420367	236.496481029928	33.230638	1
63756689	40.248	-76.821	3757.5	761.348140493031	236.498894427489	33.963767	1
63841480	40.225	-76.839	3760.5	763.297096664672	236.501304999643	28.9625	1
63943242	40.199	-76.857	3763.5	765.241252705254	236.503759230424	32.508004	1
64044997	40.18	-76.875	3765.5	767.200098122054	236.502173671309	32.267998	1
64146997	40.157	-76.893	3765.5	769.152166402084	236.502460168498	54.848689	1
64249230	40.143	-76.911	3765.5	771.121945503908	236.500907853468	32.808092	1
64351553	40.122	-76.929	3765.5	773.079388587849	236.499313733477	34.261972	1
64454001	40.103	-76.947	3768.5	775.04129314243	236.496481808619	31.76389	1
64556581	40.081	-76.965	3772.5	776.998646197815	236.492860952329	31.413104	1
64659247	40.06	-76.983	3774.5	778.958649945606	236.487823412251	33.831362	1
64761925	40.039	-77.001	3774.5	780.919501001328	236.481313635968	31.099784	1
64847412	40.015	-77.019	3772	782.87620296145	236.473475907577	35.538505	1
64950039	39.993	-77.037	3770	784.837190334102	236.39537814386	31.397982	1
65052745	39.97	-77.055	3771	786.797469111544	236.374321785827	31.185665	1
65155434	39.947	-77.073	3775	788.758691031819	236.350214851177	27.33845	1
65258012	39.928	-77.092	3778	790.837945244498	236.320664316431	29.51712	1
65360532	39.912	-77.11	3780	792.811412134976	236.288985013471	30.558901	1
65480064	39.899	-77.128	3781	794.789837862663	236.252717403889	27.827146	1
65565543	39.878	-77.145	3781	796.645958479856	236.216913194794	29.238009	1
65685187	39.861	-77.163	3782	798.619554751156	236.175657001635	28.658832	1
65770711	39.836	-77.181	3783	800.582506852711	236.132872566088	29.398415	1
65890354	39.817	-77.2	3785	802.66567820962	236.084641576041	32.568922	1
65992857	39.795	-77.218	3786	804.634458813046	236.037966268679	31.352985	1
66095341	39.773	-77.236	3788	806.604043913533	235.990507747804	30.151736	1
66197731	39.759	-77.254	3790	808.584655278705	235.941793230146	29.299472	1
66317094	39.738	-77.273	3791	810.667885886	235.891856553548	28.354058	1
66402257	39.713	-77.291	3792	812.635905324217	235.846668825653	30.589385	1
66521225	39.698	-77.309	3792	814.616817995699	235.801786265295	27.019229	1
66623193	39.675	-77.327	3792	816.588757283473	235.760691947774	30.882433	1
66725262	39.657	-77.345	3792	818.567216929574	235.72162501449	25.508704	1
66810211	39.631	-77.363	3791	820.537301169883	235.70590162527	29.213272	1
66861177	39.614	-77.373	3791	821.629439004491	235.690996114949	22.450643	1
69099136	-60.916666	-70.583333	119.5	66.7804552567455	272.809502194995	390	1
116179620	-70.633333	-74.016666	1157	85.2788579075945	270.280286209856	580	1
46865456	-22.53333	-77.03333	1600.5	112.094427870375	262.20994357268	155	1
83664901	-46.272833	-78.3075	700.5	225.849719092791	264.292471382814	204	1
93313218	-45.724333	-79.614166	792	217.804936332425	260.879542077076	128	1
338020316	139.66667	-66.78333	543	18.3119907962721	268.77552090448	445	1
337705158	139.55	-66.85	689	27.308434607368	266.955480270037	380	1
336804745	139.25	-67.05	1082.5	52.9070806000973	264.221996943907	520	1
335451358	138.8	-67.33333	1454.5	87.1724842629046	263.293959006665	390	1
330472824	137.31667	-68.35	2270.5	208.620375891341	255.429402946582	296	1
325720003	135.8	-69.33333	2423	331.336513441912	251.968159528775	232	1
322485397.1	134.71667	-70.01667	2539.5	397.925098806726	248.239355885678	223	1
322646571	139.98333	-71.56667	2411.5	464.336209271874	246.750406574282	126	1
308576936	130.4	-72.31667	3087	578.429786809482	244.007337509324	104	1
300734496	128.73333	-73.06667	3148.5	658.680750232136	240.727426737916	82	1
279475940	124.06667	-74.7	3234.5	856.870413269246	237.360384076363	35	1
81089042	-64.45	-70.833333	2029.5	123.489642832438	268.209995204364	440	1
272370	-2.35	-70.275	49	99.6618885240401	269.26412713749	439	1
17331322.1	41.090555	-69.204722	1118	50.7885726864505	270.29672435036	307	1
17331322.2	41.090555	-69.204722	1118	50.7885726864505	270.29672435036	311	1
27234886	-3.43	-75.59	2668.5	350.558698087128	249.344007971833	38.2	1
27234886.1	-3.43	-75.59	2668.5	350.558698087128	249.344007971833	62.6	1
196527401	93.7	-67.58	1576.5	101.926752873524	264.569072948533	360	1
220167625.9	106.84	-78.45	3487	1212.75661265117	235.478196229163	22.9	1
71730592	-66	-67.533	1253	18.1546381966869	276.038125543221	423	1
60737182	-60.933	-68.767	5.5	230.365817894631	273.277264221069	342	1
118664423	-75.333	-70	314.5	58.1601095129302	279.094400259988	1665	1
77369238	-64.483	-70.01667	2145.5	130.689193008491	268.844384067217	162	1
68748539	-60.733	-70.617	335.5	64.2591067979812	273.235326813355	396	1
81089042.1	-64.45	-70.833	2029.5	123.502383767876	268.209237154647	432	1
83288922	-64.5	-71.25	1872	99.858405205505	268.610188960935	504	1
93866499	-67.483	-71.3	197.5	186.112267793071	272.462930998451	216	1
84157069	-64.083	-71.7	1838.5	58.5483360562675	267.710657131687	414	1
75455029	-60.333	-72.2	7	16.2148683733436	272.014957018302	207	1
117652269	-72.833	-72.5	293.5	38.8693508305426	274.517837267651	891	1
91030793	-64.5	-72.783	1767	93.0310789575459	266.470470232612	513	1
126871638	-75.25	-72.933	425	53.9826214539183	272.78713016426	1125	1
96726604	-64.807	-73.7	1812.5	97.3373527639841	264.698267707633	423	1
69134178	-60.917	-70.587	113.5	66.3744483906932	272.810769767951	420	1
116179620.1	-70.633	-74.017	1157	85.3120430263753	270.278573533056	880	1
280031794	124.166666	-74.65	3231.5	850.774550295332	237.403160542967	38	1
280031794.1	124.166666	-74.65	3231.5	850.774550295332	237.403160542967	32	1
338130254	139.62	-66.73	491	13.906508811548	270.05615500903	440	1
337208143	139.2	-66.9	927.5	38.0143435191784	266.001350200304	600	1
336868729	139.11667	-66.98333	1023.5	47.9566097018484	264.712298328016	320	1
336524871	139.01	-67.06	1172.5	56.7815929539616	264.060220500669	240	1
335451358.1	138.8	-67.33333	1454.5	87.1724842629046	263.293959006665	560	1
335825577	139.2	-67.35	1422.5	81.9927930629816	263.623094225726	420	1
335101001	138.63333	-67.38333	1525.5	92.9194609891167	262.93871192792	260	1
333956949	138.3333	-67.6333	1744.5	122.004509505435	262.674976711251	240	1
333956949.1	138.33333	-67.63333	1744.5	122.007600919366	262.674986585589	240	1
332826501	138	-67.86667	1917	150.155428728245	262.498936533111	360	1
332083684.1	137.78333	-68.01667	2039	168.290132575526	261.667337779998	330	1
331271460	137.55	-68.18333	2054	188.373006263911	258.898220542906	410	1
330449599	137.3	-68.35	2274.5	208.78858647938	255.423269772072	320	1
330025072	137.2	-68.45	2332.5	220.579661842106	253.901433985633	260	1
329869203	137.5	-68.6	2345.5	234.189484930383	252.910861687044	260	1
325720003.1	135.8	-69.33333	2423	331.336513441912	251.968159528775	230	1
325425982	136	-69.5	2438.5	346.164411976504	251.654942197195	200	1
322485397.2	134.71667	-70.01667	2539.5	397.925098806726	248.239355885678	240	1
322534308	135	-70.1	2523	411.899322427971	248.024267736711	240	1
314113019	132.1	-71.65	2941	516.933701133165	244.397199042749	130	1
300979988	128.8	-73.05	3154.5	656.824441395208	240.76957161462	80	1
291576203	129.16667	-74.65	3102	834.838677487175	239.682099738189	32	1
332083684.2	137.78333	-68.01667	2039	168.290132575526	261.667337779998	50	1
178669054.4	0	-90	2758	1249.30391261843	241.294325	65	1
30729087.1	7.216666	-75.933333	3145.5	528.465983019641	244.918243945064	51	1
33418198	5.8	-76.3	3030.5	548.261430667563	245.421765549113	47	1
34899254	9.533333	-76.366666	3181	602.128074645268	243.964138007325	45	1
35838075	4.266666	-76.633333	2916.5	569.828577775345	246.124898995376	51	1
39438310	11.883333	-76.833333	3217	678.68837132197	242.792659585096	52	1
39928811	1.766666	-77.166666	2693.5	530.348246340896	247.636909172361	43	1
43944539	14.416666	-77.266666	3254	730.592724602748	242.149111433099	45	1
42596664	0.083333	-77.5	2580	497.15023501941	248.610486617064	42	1
48517261	17.166666	-77.666666	3301.5	786.523247323848	241.341894768903	29	1
45819366	-1.916666	-77.883333	2404	465.786829343146	249.129475846584	56	1
53109696	20.083333	-78.016666	3316	834.11407870598	240.511631822064	19	1
49205338	-4.016666	-78.266666	2319	442.849032489162	249.89478409968	52	1
57775900	23.366666	-78.316666	3390	863.482152094387	239.732773072807	25	1
62873296	27.083333	-78.583333	3443.5	900.344050521548	238.956851110673	36	1
53460909	-6.866666	-78.7	2153	423.869532077883	251.233898785589	45	1
66264557	29.716666	-78.716666	3493.5	926.912013726394	238.512644811289	35	1
70745060	33.233333	-78.85	3550.5	965.236884272019	237.527530065979	37	1
76939936	36.716666	-79.133333	3600	1017.29903354012	236.143677308758	35	1
82681588	40.5	-79.25	3664.5	1031.13374959302	234.743208835991	27	1
84579426	37.166666	-79.95	3542	1107.58076460893	235.986249040503	25	1
84744005	33.75	-80.383333	3433.5	1128.05055854677	239.25925122638	20	1
84929462	29.833333	-80.8	3264	1152.6519890751	241.012025354886	24	1
85011984	27.633333	-81	3147.5	1130.72851978851	241.918244243445	50	1
85032476	25.5	-81.166666	3051.5	1096.86057657408	242.533833201923	44	1
85135855	24	-81.283333	2973	1074.28420186319	242.987689044422	16	1
85176974	20.5	-81.5	2753.5	1024.06123715314	244.013331311654	6	1
85363515	19.583333	-81.566666	2713	1012.10824130003	244.247133105435	6	1
85093835	17	-81.666666	2598	976.953188764908	244.621409690413	36	1
84948784	14.666666	-81.75	2549.5	946.790938831273	244.355763283009	35	1
86009694	9.583333	-82	2459	892.556872715548	243.660421773395	24	1
125298081	55.1	-82.116666	3729.5	1405.64500269456	235.37171524729	31	1
125216371	55.033333	-82.116666	3728.5	1405.19561008223	235.380988351438	27	1
124076120	53.666666	-82.2	3704	1404.81215474476	235.602465025633	34	1
124788130	52.866666	-82.45	3663.5	1425.72705931875	235.839267238803	25	1
122730390	51.083333	-82.45	3623.5	1416.43817120627	236.166223837831	30	1
120095634	48.5	-82.483333	3546.5	1408.64741308729	236.958096026886	31	1
93446023	13.333333	-82.55	2517.5	949.326613712997	242.92432002977	38	1
119520450	46.416666	-82.7	3463	1397.88396998919	237.512856798626	23	1
115031238	41.083333	-82.8	3336	1325.45510520209	239.400145925117	31	1
124808230	50.516666	-82.833333	3553	1441.17250248188	236.314719603595	37	1
110852843	35.75	-82.866666	3105	1253.67645273772	241.341491964185	33	1
99101349	18.166666	-82.866666	2589.5	1016.19919038473	243.55552093735	36	1
109539743	34	-82.883333	3041.5	1230.13139447577	241.898903427482	53	1
106682120	30.333333	-82.883333	2937	1181.48080783038	242.900457942867	25	1
104625394	27.166666	-82.9	2819	1138.57002800701	243.526247549671	32	1
102883436	24.166666	-82.916666	2713	1097.69061901145	243.84221140743	8	1
124116150	47.466666	-83.166666	3437.5	1387.27210532894	237.386142699902	26	1
124238124	44.55	-83.533333	3373.5	1336.23586164244	238.998210587477	43	1
124400787	41.3	-83.883333	3292	1285.56052925266	239.964602273271	30	1
123504826	33.9	-84.366666	2975.5	1190.97591032389	242.164812619859	24	1
122912588	30.1	-84.533333	2861	1148.10312439782	242.748419777112	19	1
122544445	26	-84.7	2730	1104.54479936191	242.856326974694	16	1
122339823	21.8	-84.85	2676	1062.77049353673	241.930433801772	46	1
122257877	17.9	-84.966666	2660.5	1026.2924678596	241.599447734429	43	1
121787932	1.6	-85.166666	2586.5	887.9935688062	242.006282129647	61	1
123360995	13.2	-85.183333	2657	988.089758056393	241.330614767514	11	1
122809282	7.7	-85.216666	2627	941.210888931594	241.404838383977	39	1
124907277	4.7	-85.433333	2621	927.139983357776	241.651579179698	50	1
129023933	8.7	-85.766666	2663.5	974.271276488338	241.363976231457	42	1
134355263	14.8	-86.15	2704.5	1034.82079803691	241.41201043819	50	1
143988493	30.6	-86.633333	2854	1154.27476488604	241.265833528191	55	1
148609476	40	-86.733333	3008	1214.9481525047	240.567063690744	38	1
158117761	58.6	-86.75	3116	1329.19771216639	238.497333350819	43	1
153395871	49.2	-86.8	3089.5	1271.19898196171	239.490196741404	48	1
161597702	58.9	-87.283333	3062	1311.1874088387	238.476327956144	47	1
163314162	59	-87.55	3051.5	1302.63854537247	238.467196407078	45	1
164951611	59.2	-87.8	3047	1295.52680116905	239.065402291133	29	1
166641117	58.9	-88.083333	3036.5	1286.01510623361	239.068122995732	56	1
168104921	58.9	-88.316666	3026	1279.73026684563	239.070470328445	48	1
170649386	58	-88.75	3017.5	1267.22205891466	239.149820320828	42	1
173403163	58.5	-89.166666	2980.5	1260.39566443602	239.155252501416	64	1
176260470	60	-89.6	2837	1254.95102560071	239.065678501204	65	1
178669054.5	0	-90	2758	1249.30391261843	241.294325	67	1
81148410	-66.266666	-69.5	906	41.273892407187	274.23735455765	973.08	1
80371029	-65.08333	-70.23333	2049.5	130.961014804166	268.550040374356	486.54	1
92690248	-68.45	-70.25	25.5	91.5180955368461	274.293063985666	615.06	1
93222415	-68	-70.75	3.5	149.242573775569	273.706114638871	229.5	1
81089042.2	-64.45	-70.83333	2029.5	123.489757571952	268.209988373075	440.64	1
83020006	-64.95	-70.883333	1805.5	135.548449151442	268.579445334028	440.64	1
83288922.1	-64.5	-71.25	1872	99.858405205505	268.610188960935	514.08	1
95268980	-67.93333	-71.25	16	203.050483261268	273.167928111946	201.96	1
87332831	-65.5	-71.383333	1466.5	119.303042963429	269.698913490193	559.98	1
92882485	-66.966666	-71.483333	848	161.40064633046	271.890680732063	587.52	1
84177623	-64.083333	-71.7	1834.5	58.5587541664812	267.710700194705	422.28	1
96681320	-67.683333	-71.75	20	178.327527941794	272.514311329868	211.14	1
99312637	-67.76666	-72.25	41	179.095221311478	272.549898495186	504.9	1
117652269.1	-72.83333	-72.5	293.5	38.8596062684187	274.518025603759	872.1	1
91052079	-64.5	-72.783333	1764	93.0147393990654	266.468172781849	523.26	1
126871638.1	-75.25	-72.93333	425	53.9977800036952	272.785167290031	1147.5	1
125408374	-74.75	-72.98333	449	41.5790982638414	272.630870996297	1184.22	1
96638400	-64.783333	-73.7	1817	96.6276220450114	264.68940082021	431.46	1
116179620.2	-70.633333	-74.016666	1157	85.2788579075945	270.280286209856	890.46	1
197758722	94.08	-68.25	1995	175.04091530942	259.585026318345	272	1
199055798	94.47	-68.77	2331	233.374055693972	254.568989075591	69	1
200992089	95.02	-69.3	2585.5	292.290653123718	254.36694322368	140	1
306532872	147.356816	-76.640333	2480	380.89983386237	243.648876189331	25	1
297849855	141.909333	-76.8748	2575	511.703322988127	242.609077217148	17	1
309683458	155.4913	-77.200133	2348.5	172.278856130126	249.346396208322	20	1
285216961	137.023533	-77.53535	2628	619.869004207594	242.684929639739	19	1
196527401.1	93.7	-67.58	1576.5	101.926752873524	264.569072948533	313	1
203902444	96.62	-72.22	3269	602.486713128284	244.67611678885	68	1
204016439	97.07	-73.25	3431	713.047666330964	240.424842456391	84	1
204176341	97.5	-74.1	3504	805.368894519494	239.894828943315	64	1
193115682	95.17	-76.92	3762	1026.5215197912	236.427994264957	33	1
220167625.10	106.84	-78.45	3487	1212.75661265117	235.478196229163	21.9	1
338376847	139.78	-66.7	212	7.90794555125424	270.802972495819	417	1
337208143.1	139.2	-66.9	927.5	38.0143435191784	266.001350200304	566	1
336868729.1	139.11667	-66.9833	1023.5	47.9535527061544	264.712604583933	297	1
336524871.1	139.01	-67.06	1172.5	56.7815929539616	264.060220500669	235	1
335825577.1	139.2	-67.35	1422.5	81.9927930629816	263.623094225726	438	1
335101001.1	138.63333	-67.38333	1525.5	92.9194609891167	262.93871192792	269.8	1
332826501.1	138	-67.86667	1917	150.155428728245	262.498936533111	354.5	1
332083684.3	137.78333	-68.01667	2039	168.290132575526	261.667337779998	30.24	1
331271460.1	137.55	-68.1833	2054	188.369748935318	258.898814218623	340	1
330449599.1	137.3	-68.35	2274.5	208.78858647938	255.423269772072	275	1
330449599.2	137.3	-68.35	2274.5	208.78858647938	255.423269772072	320	1
330025072.1	137.2	-68.45	2332.5	220.579661842106	253.901433985633	258	1
82713490	-50.63333	-77.13333	35.5	372.469214440217	266.474074880828	220	1
1438396	-8.366666	-70.6	39.5	53.768065231187	273.688801633609	335	1
2286320	-7.4	-70.933333	142.5	14.9469050719888	272.46359321182	173	1
3492047	-8.65	-71.25	74	8.64866035465622	269.768919152032	295	1
16756452	0.366666	-74.166666	2663.5	279.688032494595	251.358775481777	116	1
33607836	-6.083333	-76.316666	2459	319.700853344309	250.513289548124	71	1
40298080	-10.55	-77	2181	235.649856178556	253.741975833207	69	1
39361215	-6.666666	-77.016666	2308	323.221853391161	250.966877273199	68	1
40387177	-10.433333	-77.016666	2179	239.104943613723	253.656600794329	70	1
40624441	-10.333333	-77.05	2170	243.22451605826	253.582104362965	63	1
1483434	-8.366666	-70.616666	41.5	52.5365564193671	273.678779814546	353	1
160441452	-83.916666	-75.916666	1030	225.33448978756	262.046864106682	500	1
21316194	-11.15	-74.55	1298.5	101.800293880034	258.489364552753	-98	1
21329096	-11.18	-74.55	1336.5	101.105793586934	258.540724843406	-56	1
21329096.1	-11.18	-74.55	1336.5	101.105793586934	258.540724843406	-2	1
21342000	-11.22	-74.55	1379.5	100.185006612641	258.609414579994	2	1
21354915	-11.25	-74.55	1376.5	99.4984171364544	258.661002478888	4	1
21367842	-11.27	-74.55	1360.5	99.0426356914493	258.695390891699	27	1
21393736	-11.15	-74.56	1250.5	102.495135063842	258.460795517884	75	1
21406684	-11.19	-74.56	1290.5	101.576786239873	258.530416613377	40	1
21432593	-11.27	-74.56	1302.5	99.7584382373553	258.670210974667	8	1
21432623	-11.07	-74.57	1170.5	105.037969751472	258.294037635853	-138	1
21432623.1	-11.07	-74.57	1170.5	105.037969751472	258.294037635853	-82	1
21432620	-11.09	-74.57	1179.5	104.575625991362	258.328772612791	-103	1
21445579	-11.1	-74.57	1175.5	104.344990850826	258.346211126998	-111	1
21445576	-11.12	-74.57	1181.5	103.884805997697	258.381216838512	-55	1
21458538	-11.14	-74.57	1178.5	103.426084517417	258.416375535057	-85	1
21458536	-11.16	-74.57	1186.5	102.968846019898	258.451664107179	-33	1
21458536.1	-11.16	-74.57	1186.5	102.968846019898	258.451664107179	-6	1
21471498	-11.19	-74.57	1221.5	102.285812466855	258.504788092778	4	1
21471498.1	-11.19	-74.57	1221.5	102.285812466855	258.504788092778	-11	1
21484463	-11.22	-74.57	1286.5	101.606228828991	258.558067569959	45	1
21484461	-11.23	-74.57	1295.5	101.380479628891	258.575847366341	-2	1
21497440	-11.24	-74.57	1287.5	101.155124127279	258.593631908442	-21	1
21510447	-11.11	-74.58	1169.5	104.817233428346	258.337361370331	-100	1
21523439	-11.12	-74.58	1249.5	104.589011445325	258.355169530811	-17	1
21523437	-11.14	-74.58	1218.5	104.133680600174	258.390911743223	-65	1
21549428	-11.21	-74.58	1293.5	102.551969928781	258.516983721572	14	1
332442652.1	158.75	-72.366666	2238	245.485240904193	253.617171248309	105	1
332426823	158.75	-72.37	2242	245.805930123767	253.613224226233	105	1
330942144	159.08	-72.77	2332	235.831320813002	251.396324732772	86.6	1
330824487.2	159.1	-72.8	2331	233.090640496036	251.122835489541	86.2	1
332069974	165.466666	-73.1	2649	71.3963560187008	257.649704476794	129	1
332069974.1	165.466666	-73.1	2649	71.3963560187008	257.649704476794	112	1
323433094	139.183333	-71.116666	2473	446.20607229279	247.973021844622	148	1
321944406	140.25	-71.833333	2422	482.601753338116	246.783888166436	146	1
323564783	143.2	-72.1	2286.5	454.944096631569	247.797439384657	178	1
327112601	148.2	-72.133333	2121.5	367.522153418594	249.514471398383	183	1
325453700	145.883333	-72.133333	2219	401.478877756334	248.474059402291	207	1
328885042	151.233333	-72.2	2121.5	357.768333536776	250.572279522836	193	1
330322349	153.8	-72.233333	2130	337.0570371719	251.029683981593	193	1
331562612	156.366666	-72.283333	2201	278.785694645203	251.490927811396	178	1
332442652.2	158.75	-72.366666	2238	245.485240904193	253.617171248309	151	1
320658321	141.35	-72.466666	2429.5	524.245010586194	247.018537461851	171	1
332592470	161.533333	-72.633333	1570	192.359025110348	255.527794514108	163	1
319273935	142.5	-73.116666	2451	555.544706517453	244.837727538317	117	1
317766270	143.466666	-73.733333	2476	585.868758988039	245.100641612773	148	1
315618727	144.25	-74.45	2515	533.957130667463	243.535455096209	205	1
314376730	146.816666	-75.2	2467.5	438.69219511978	244.055775618091	101	1
312831075	148.45	-75.783333	2439	375.771153135117	244.463613837618	132	1
310711282	150.4	-76.45	2422	309.712209593838	244.977067477178	71	1
15576807	40.45	-69.037	964.5	26.5068193308328	270.959593386737	240	1
23603327	42.718	-69.877	1744	118.75040094592	260.418663810031	122	1
32688420	44.66	-70.796	2329	225.905736994251	254.567612021674	72	1
34465395	45.148	-70.941	2423	249.553040889132	254.074692516385	138	1
34832079	44.507	-71.211	2422.5	249.221292414346	252.918008860174	85	1
40662768	46.953	-71.423	2688	332.993672936788	248.525830066794	121	1
40095862	31.489	-75.003	3396.5	553.412261283303	242.130999994355	68	1
47039636	31.388	-76.003	3632.5	656.732450196715	237.737726494348	35	1
58382781	35	-77	3754.5	785.565665327835	237.065686839798	33	1
248309432	-151.215277	-83.410555	172	628.604221545786	262.645818141633	73.36	1
245088465	-175.833333	-84.486666	84.5	696.70299451368	265.646261144832	155.89	1
8779058	3.662777	-72.678333	2744	175.891148221501	258.163521685378	55	1
9909899	5.351388	-72.861388	2993.5	233.060566691851	252.574573559145	23	1
22674433	12.790833	-74.647222	3408	436.451287087416	242.686185175014	45	1
5146192	3.083333	-71.9	1449	105.898129935783	262.961892117932	135	1
6074682	3.175277	-72.133611	2018	129.795238570747	262.943316250753	171	1
6606772	2.891111	-72.251111	2288	127.703611617158	262.954391081037	119	1
7831510	3	-72.5	2512.5	146.292955762825	261.987268400252	112	1
10796584	5.044166	-73.040555	2944.5	236.375743715349	250.597945283457	28	1
12841208	6.460555	-73.386388	3070	295.878324856151	249.042065594895	44	1
14981700	7.940555	-73.724166	3171	351.070402305057	248.069565113467	52	1
17360927	9.491666	-74.044722	3268.5	375.536669186202	247.295576673638	55	1
19962440	11.103611	-74.354444	3342.5	403.963714977168	244.545806250705	45	1
26367913	15.001666	-74.999722	3459	484.963014493856	241.878600000001	51	1
261969974	-123	-77.2	2047.5	273.463177655521	258.720850358358	83.26	1
275603431	-130	-77.2	1992.5	260.107198522553	259.472873554593	99.36	1
267774145	-126.14058	-77.280378	1922	283.485025961897	259.001593152358	61.64	1
285384187	-136	-77.3	1713.5	231.417159249499	262.388189878992	94.76	1
248602695	-119.15339	-78.122778	1730	380.655032780641	259.027755610085	201.48	1
260103412	-125.230818	-78.20105	1663.5	387.154373921561	259.673062271498	119.6	1
270577313	-131.20129	-78.210027	1538.5	357.654570150663	261.4404727901	116.38	1
262255114	-130.4152	-79.193952	1221	401.811410482896	262.573553828489	89.7	1
249765530	-123.340556	-79.281305	1489.5	504.611473548258	260.103153388905	166.98	1
224485271	-110.393855	-79.365314	1820.5	451.359953918208	258.434936512044	189.06	1
266705572	-134.321322	-79.39247	853.5	340.566318687891	263.88761638803	126.96	1
254473878	-127.180354	-79.560501	1376	478.302720038854	261.177418822163	114.54	1
238260985	-119.302807	-80.004148	1537.5	562.292992045873	259.636887538908	118.22	1
255257788	-130.430861	-80.161513	1007.5	451.663181236561	262.755083377919	110.4	1
212729061	-106.294881	-80.164844	1954	535.725713406629	257.701933569343	203.32	1
226978916	-113.500789	-80.181164	1669.5	546.857015151145	259.18032937113	153.18	1
259494289	-134.094076	-80.285286	742	406.305110051939	263.459908421869	79.58	1
217996923	-109.453842	-80.465499	1811.5	571.525436700223	258.513745467151	241.96	1
247945758	-127.393751	-80.554521	1059	522.81321001674	262.790399575144	59.8	1
260633814	-140	-81.04	336.5	411.211742604081	261.829815344011	101.66	1
221052827	-112.594878	-81.091281	1719	645.125716731023	259.65582309756	222.18	1
232808305	-120.08553	-81.181088	1290	669.252728215182	261.541038325117	94.3	1
210326374	-107.002512	-81.203669	1976.5	650.960102517801	257.558206814732	201.02	1
264422322	-146.180632	-81.323855	198	401.241329132366	260.6442558344	92	1
244788110	-129.201783	-81.351062	830	550.758701000781	263.077791680284	56.12	1
264785601	-147.401726	-81.402645	438	406.691947578194	260.467585785018	121.44	1
223780699	-115.474546	-81.514713	1439.5	699.008073104657	260.591855976158	122.36	1
262358382	-146.202186	-81.550604	486.5	425.941325722922	260.632466691593	62.1	1
262358382.1	-146.202139	-81.550633	486.5	425.944636148109	260.632469857343	101.66	1
250873813	-135.350408	-81.572134	578.5	505.179997968818	262.978027501923	96.6	1
238430378	-128.274076	-82.071328	738.5	617.422093108371	262.765115484381	109.02	1
247563532	-136.190526	-82.090832	516.5	542.862480107219	261.860075942776	94.3	1
242284203	-132.0054	-82.1536	643.5	588.108186453884	262.331406381375	88.32	1
226067177	-119.443543	-82.184642	884.5	730.339625748634	263.155140728419	128.34	1
240066639	-130.475345	-82.210839	683.5	607.096708492566	262.513640358855	87.4	1
245128169	-135.305808	-82.265864	540	566.483149322659	261.973565377119	94.3	1
246322892	-137.182735	-82.363965	491	560.334019169636	261.736416193275	78.66	1
236539057	-128.442273	-82.36468	750.5	639.687726634287	262.739569218141	103.96	1
256496264	-149.060094	-82.424598	162.5	518.304797190295	260.502468051574	100.28	1
227218037	-121.422536	-82.441274	829	721.704570181815	263.303368525319	145.82	1
232041429	-125.431233	-82.483053	778	679.812592940819	263.042220707303	105.34	1
266669316	-171.103432	-82.492188	28.5	573.085811579172	260.252403025927	83.26	1
238787599	-131.314076	-82.511161	656.5	624.651055708021	262.384310636393	87.4	1
239794748	-132.320942	-82.525781	620.5	616.261975467286	262.320369654331	57.96	1
237422159	-130.390866	-82.555791	682.5	637.38320011622	262.507697226113	96.14	1
234857915	-131.352245	-83.035611	490.5	668.609334962422	262.417439657664	92.46	1
224289177	-122.16015	-83.06052	873	756.937949903551	263.18446470451	124.2	1
235449010	-132.424444	-83.10438	472.5	665.87484866532	262.425412598942	46.92	1
239145047	-136.441297	-83.133688	463	639.915212062969	261.97835654616	64.4	1
233087336	-130.401128	-83.1354	528	685.26786875866	262.665675807264	109.48	1
230727214	-128.440697	-83.173364	603.5	705.706781261321	263.088401680999	112.24	1
221878061	-121.034148	-83.222513	954.5	780.050427866997	263.32291380068	169.74	1
258287943	-169.342775	-83.224491	50	642.075868373692	262.129936211762	103.04	1
242787913	-141.595634	-83.240668	422.5	624.51114897384	262.389895042441	69	1
231213214	-129.383144	-83.242656	578	703.061327722089	263.672157665154	59.8	1
238200177	-136.405798	-83.243741	402	650.923399948827	263.19411100456	92	1
241594015	-140.402215	-83.263046	400.5	631.801917144789	262.751267866431	90.62	1
244112729	-143.540119	-83.271797	407.5	621.22911508881	262.550058455325	74.52	1
237338576	-136.270272	-83.332123	392	660.433296438466	264.112504665333	72.22	1
205676304	-109.335771	-83.3329	1665.5	888.798421068601	257.818071437581	80.96	1
238851222	-138.054882	-83.344479	349	651.570122301751	264.090976880121	63.94	1
245384123	-146.143829	-83.350406	404.5	623.903502527064	262.767077079659	74.52	1
232532371	-131.470872	-83.354303	483	695.633991012148	264.599291932725	88.78	1
239753524	-139.49373	-83.384041	328	648.504996194479	263.95943583014	60.72	1
242850931	-143.355968	-83.391743	365.5	634.758643620947	263.538457280903	84.64	1
242829971	-143.34361	-83.393654	364.5	635.001524680162	263.539681550621	77.74	1
225586812	-125.204857	-83.403095	741	753.578333596043	264.363595073509	87.86	1
237906162	-137.592789	-83.405742	345	660.229080081919	264.331909341455	69.92	1
236623875	-136.201841	-83.410932	379	668.599282639896	264.484061382505	85.1	1
245895648	-148.104056	-83.443062	385	631.942082976543	262.836030475544	58.88	1
243838633	-145.401843	-83.45422	339.5	636.6489497094	263.242473988736	37.26	1
246045495	-149.36231	-83.514823	304	639.477287752888	262.679789485753	74.52	1
236897124	-137.550609	-83.521706	359	672.167498108097	264.337724373509	94.3	1
232852618	-133.283004	-83.541417	462.5	699.640120637209	264.706202695026	74.98	1
243733395	-146.460553	-83.545351	312.5	644.953571573286	263.050789486568	62.56	1
244387712	-147.590883	-83.560761	322.5	645.394295291886	262.877649975464	104.42	1
240423272	-142.245757	-83.563568	289	656.701750430822	263.716875940869	89.24	1
213696449	-116.281146	-83.590539	1285.5	853.012360393064	261.52863933647	75.9	1
231023298	-135.582617	-84.020935	440	732.489884866265	264.656982620092	90.16	1
240068150	-148.095051	-84.040459	176.5	698.295297392668	262.683193586846	81.42	1
237738747	-144.580386	-84.044154	216.5	702.992558216975	263.388853752414	62.56	1
232191759	-137.255365	-84.04533	380	726.871231925189	264.386935433308	116.38	1
196579205	-104.313829	-84.062944	1922	970.142058511601	254.826410722293	98.9	1
220495119	-125.121897	-84.122278	878.5	810.430631858253	264.464655797703	161	1
237843805	-146.114766	-84.141082	176.5	711.244193747826	263.136865566928	92.92	1
216244894	-121.265586	-84.142727	1009	843.712813955365	263.619443613003	95.68	1
244113789	-159.260821	-84.211261	69.5	722.218355404642	263.656271337814	98.44	1
220943022	-126.490389	-84.251629	886.5	810.791292740927	264.584382398343	125.12	1
326543785	134.914777	-68.752777	2403	274.42781873078	252.086275113761	248	1
321403635	134.133583	-70.142277	2619	395.805887184136	248.092776109001	198	1
317269519	133.021416	-71.047333	2794.5	464.419410406667	247.672596902252	118	1
311886820	131.295083	-71.936916	3002.5	541.443842868394	244.193674247871	86	1
302682887	129.17125	-72.904777	3150	640.828011458728	241.28315251907	51	1
290084895	126.580833	-73.97425	3172.5	763.797802158452	240.048964681114	58	1
83623493	-46.283	-78.3	700.5	226.30184387573	264.2986742657	266	1
93505185	-45.617	-79.658	800	217.614950833784	260.933815129635	176	1
276122370	-174	-81.66	28	483.73267770135	258.820180211213	94	1
253301766	-173.1	-83.74	58	648.009148152935	266.046368563616	84	1
222984415	-115.98924	-81.82209	1308.5	734.166399173103	262.287819724403	118.82	1
238598319	-128.24643	-82.0433	739	615.474645018449	262.766880353165	109.68	1
225958031	-119.80418	-82.28958	866.5	731.897660574255	263.197615470594	127.96	1
245532165	-135.86952	-82.29183	528	564.034371070124	261.896324201082	91.4	1
235343445	-128.67088	-82.57161	719.5	654.983302926246	262.684488958625	100.54	1
225849031	-121.64538	-82.71191	850	737.426031561387	263.259831353123	137.1	1
242577878	-136.53708	-82.73084	500	600.206987910764	261.808003675878	82.26	1
230325734	-125.5039	-82.75107	759.5	699.95991515304	263.051221985832	100.54	1
236812502	-131.24069	-82.7633	621.5	646.333191197087	262.420990099317	82.26	1
240568997	-135.15527	-82.80474	503.5	617.315028470941	261.983074710057	91.4	1
239606413	-134.40216	-82.82983	490.5	625.407109983648	262.077248329787	118.82	1
242347593	-137.45329	-82.86308	519	606.908028763429	261.695764873161	127.96	1
234815335	-130.32781	-82.89793	565.5	665.941058200755	262.536632919208	91.4	1
240380926	-135.94782	-82.92699	498	623.163259176962	261.886906642846	82.26	1
235238492	-131.63355	-83.02619	482.5	665.421364651456	262.392298245836	91.4	1
235554019	-132.7224	-83.13006	463.5	665.844499799957	262.546689567299	91.4	1
232574875	-130.0916	-83.16234	528	690.207133257394	262.922365197727	100.54	1
238788094	-136.36263	-83.16598	430	643.569981735043	262.439308618755	63.98	1
225411310	-124.29865	-83.27828	773	753.164720659211	263.906431517248	109.68	1
230135680	-128.75809	-83.30342	602.5	713.520187242813	264.179094409247	109.68	1
221098857	-121.15456	-83.37141	965.5	789.80474936148	263.50723207924	164.52	1
230347325	-129.5303	-83.38433	560.5	713.758923167497	264.734609301792	118.82	1
240276749	-140.13322	-83.38793	318.5	646.046762337578	263.993040055733	91.4	1
237843192	-137.89929	-83.44495	344	662.577940225049	264.307181351599	82.26	1
235763958	-136.38313	-83.53578	394.5	679.904107571829	264.475026243499	82.26	1
236918142	-137.70987	-83.53693	360	672.88818333312	264.323300656633	63.98	1
230769685	-131.45625	-83.58381	512	716.319531838599	264.765747109539	82.26	1
238053403	-139.78299	-83.60628	322	670.384973518617	264.040735562414	63.98	1
205195306	-109.92655	-83.63316	1575	922.616121107395	257.978536432831	164.52	1
240276964	-142.86531	-83.63361	260.5	662.349287443978	263.602827532922	82.26	1
223848375	-125.20962	-83.65305	806	772.59764785553	264.411782289758	173.66	1
235847955	-137.64255	-83.65421	405.5	685.143151776876	264.332090549966	73.12	1
234390197	-136.05873	-83.66635	418.5	694.67786442679	264.512798352326	91.4	1
242557824	-147.54819	-83.74545	229.5	665.918326324541	262.873610198205	54.84	1
240904332	-145.11839	-83.74555	226.5	669.200463514179	263.276588574192	73.12	1
234283731	-137.53676	-83.83012	376.5	703.581111290367	264.347340534337	91.4	1
232554056	-135.60437	-83.83582	419.5	713.972315429929	264.59004262297	63.98	1
242683704	-149.62599	-83.87157	176.5	679.147247152978	262.451075109646	54.84	1
230241907	-133.41563	-83.88574	520	731.390374795427	264.726555409356	146.24	1
240172629	-146.33394	-83.91236	196.5	685.686839897082	263.092797619328	73.12	1
237002506	-142.14024	-83.93197	320	696.651451665426	263.692238922156	45.7	1
237759701	-144.04367	-84.00187	274.5	699.44199493581	263.426200003423	45.7	1
231298573	-135.80869	-84.0108	435	730.325302145341	264.55487304955	91.4	1
211741600	-116.72289	-84.02873	1239.5	877.569074111461	261.941931857954	146.24	1
232149138	-137.32068	-84.05846	378	727.919669614859	264.366258567425	118.82	1
239439745	-147.54244	-84.07138	177.5	702.083906403107	262.92702975771	82.26	1
237549595	-144.73113	-84.0756	200.5	706.163339288081	263.337132919338	82.26	1
197072180	-105.02477	-84.18232	1941	982.829006111553	255.162320437128	182.8	1
219731386	-125.18683	-84.23885	901.5	819.398608488313	264.437758594502	173.66	1
236687643	-145.87819	-84.24574	176.5	723.109842278421	263.152874195564	82.26	1
215477009	-121.48649	-84.29517	1021	853.053424166885	263.600895212029	201.08	1
224863027	-132.96428	-84.50784	738	793.936905918729	264.708676735855	73.12	1
225390233	-133.64253	-84.50977	705.5	790.697595321857	264.662997326308	73.12	1
225850286	-134.45435	-84.53703	679.5	789.477584733612	264.623278725466	73.12	1
226721619	-135.61459	-84.54346	629.5	784.870260094556	264.521195257907	54.84	1
53249343	-25.366666	-77.566666	1331	126.419742834957	260.357430793844	56	1
338294740	140	-66.8	305	12.0198833543826	268.558557380292	460	1
337010536	139.3	-67	1017.5	46.9408876569882	264.626670590487	460	1
285086594	113.1	-67	1100	85.5343752054318	268.672403492143	590	1
194040668	93.1	-67	966	45.125657913058	265.697080051031	515	1
336804702	139.4	-67.1	1140.5	54.343223907897	264.012541948897	490	1
335451300	139	-67.4	1513.5	91.347516545685	263.566471372903	250	1
281741866	112.8	-67.5	703	136.46739133627	267.869318886452	460	1
335337678	139.5	-67.6	1595.5	101.996817917962	263.62630927303	320	1
280115652	112.5	-67.6	832	147.553277466949	267.866839003072	610	1
333484915	138.4	-67.8	1840.5	139.976990589103	262.695449415511	190	1
279658910	112.6	-67.8	1083	167.250753851638	267.835633456534	410	1
196347964	93.7	-67.8	1733	126.122960447842	264.427890947372	210	1
240165378	103.1	-67.9	1951	197.139869210032	261.423573721235	600	1
334018608	139.5	-68	1825	144.867884017496	262.925660304259	250	1
331718503	138	-68.2	2115	186.476317743725	259.082016798856	300	1
275896492	112.4	-68.5	1657.5	226.642782735479	259.529639581961	370	1
199818242	94.6	-68.6	2230	214.988511345427	254.84710225415	140	1
331318752	139.5	-68.8	2143.5	231.705671603628	254.100718246956	280	1
328474965	137.1	-68.9	2349.5	270.137213219339	252.140494053536	210	1
330140743	139	-69	2302	257.840414358343	254.00230988127	140	1
326427788	135.5	-69	2398	296.503981702212	252.020930292743	223	1
326250057	136.5	-69.4	2424.5	329.857605398582	251.959271852916	232	1
271363492	112.2	-69.4	2095	315.662113002087	258.439711872893	230	1
202580465	95.4	-69.4	2618	302.548689656265	254.051329713759	125	1
206926869	96.6	-70.1	2736	374.103536383245	249.060426189561	164	1
266918409	112	-70.3	2461.5	406.483025908562	250.799255204643	185	1
204063916	96	-70.3	2815	400.854473197645	248.849659543051	155	1
325696240	139.5	-70.5	2459.5	392.184991259574	248.5476	50	1
214811880	98.6	-70.6	2782	414.459658678615	249.015134087845	149	1
263221261	111.9	-71.1	2665	490.075151034044	249.429569737838	116	1
225665565	101.6	-71.2	2886	488.940235084446	247.191616555505	112	1
204361177	96.4	-71.3	3051	504.345372760159	246.330522948508	130	1
315531043	132.8	-71.5	2876	508.504952603044	244.903630874436	126	1
230507724	103.4	-71.9	2988.5	580.574742357144	244.581293733465	92	1
258112729	111.5	-72	2812	584.045098100129	244.785323039359	68	1
204521118	96.7	-72	3217	577.957564595231	244.687279921627	100	1
238044014	105.8	-72.2	2881	608.209053291591	244.289413739822	80	1
246227827	108.3	-72.3	2859	608.446714221021	244.128015885763	64	1
205093560	97	-72.4	3298	619.912522916962	244.560230970188	100	1
303852136	129.7	-72.9	3134	641.029524376632	241.545343624623	82	1
253393552	111.2	-72.9	2919	680.795491451283	240.723350527971	52	1
205253615	97.3	-73	3394.5	684.515044932832	240.739275805307	76	1
251218365	110.9	-73.2	2977	712.460774673769	239.814036980247	64	1
257659179	113.6	-73.6	3042.5	751.004725453818	240.191314375692	49	1
249462914	111	-73.7	3020	768.014559116131	239.754056289941	43	1
205734315	97.8	-73.8	3470	771.312333048712	240.372068108159	57	1
264291336	116.6	-74	3102.5	780.674568738237	240.239119522507	43	1
257000113	114.5	-74.3	3101	821.429652752248	238.055422663556	44	1
277355133	122.7	-74.5	3218.5	846.533309436615	237.2307306565	40	1
281618512	124.7	-74.6	3225	841.867838582812	237.611769256595	38	1
207477183	98.8	-74.7	3525	869.622027594217	237.456762034028	45	1
211328099	100.5	-75.5	3546.5	959.347775945785	237.273668769479	40	1
213988436	102.1	-76.4	3541	1062.77031389768	235.684100189907	36	1
217341373	104.2	-77.3	3523.5	1169.69435333497	235.408833000507	39	1
220951807	106.5	-78	3505	1244.13459242879	235.4167	33	1
221531360	107.5	-78.5	3466	1197.23010247896	235.555386505404	25	1
208719244	96.9	-69.8	2635.5	338.844463022754	250.927704673419	221	1
202966941	95.9	-70.8	2931.5	456.180962812059	248.828778571631	102	1
202966941.1	95.9	-70.8	2931.5	456.180962812059	248.828778571631	108	1
202966269	96.3	-72	3227	580.823147154948	244.683399823641	64	1
202966269.1	96.3	-72	3227	580.823147154948	244.683399823641	103	1
203741363	97.1	-73.5	3463	740.475600452905	240.398572653443	45	1
203741363.1	97.1	-73.5	3463	740.475600452905	240.398572653443	46	1
209138627	100.1	-75.9	3583.5	1003.27861703444	236.020838209352	50	1
216763296	104.7	-77.9	3507.5	1237.46539688128	235.256785257028	25	1
216763296.1	104.7	-77.9	3507.5	1237.46539688128	235.256785257028	20	1
331271460.2	137.55	-68.183333	2054	188.373331996922	258.898161173261	166.5	1
133127534	77.921983	-71.8455	2314.5	302.098815690817	255.443227089223	127	1
122880941	76.489566	-69.921033	1079	99.1627351737258	265.091681419367	256.5334	1
122942232	76.492766	-69.938533	1104	100.827778705476	264.860920885585	255.570612	1
123023943	76.503116	-69.95605	1128	102.381640486306	264.644176223388	215.519467	1
123105642	76.512533	-69.973883	1144	103.997799976108	264.447093621371	212.821862	1
123207754	76.525433	-69.990633	1161	105.462352570614	264.276545593574	153.231068	1
123289416	76.534933	-70.0086	1176	107.118950281954	264.118220717351	184.444356	1
123350649	76.542066	-70.026266	1190	108.794761450909	263.983338050387	237.163519	1
123432245	76.5518	-70.042833	1205	110.329445890739	263.868608635471	248.578211	1
123534119	76.5639	-70.0607	1224	111.972908799618	263.758438031978	244.246558	1
123595168	76.570633	-70.0786	1246	113.710466146457	263.668360721631	303.16813	1
123676501	76.580116	-70.095533	1268	115.318309662153	263.592085611841	196.68114	1
123757835	76.586133	-70.113	1289	117.038906755494	263.528377781822	189.991508	1
123839208	76.59455	-70.130183	1310	118.704961887752	263.473425460689	218.239568	1
123940882	76.610816	-70.14775	1332	120.315948820121	263.420304139714	102.28074	1
124022236	76.621116	-70.16475	1347	121.957478363424	263.382238620217	185.309784	1
124103631	76.62825	-70.182633	1358	123.739870489699	263.35299774082	295.851547	1
124164712	76.63545	-70.20025	1365	125.500435752626	263.33090344824	197.884213	1
124286961	76.6528	-70.217883	1377	127.148003374928	263.308593549594	116.9551	1
124368416	76.660966	-70.236683	1384	129.037895413939	263.297366547449	146.316695	1
124449844	76.672166	-70.255716	1391	130.9251616582	263.289521855673	286.52494	1
124551465	76.6888	-70.273516	1410	132.630168461467	263.283392405055	342.108492	1
124652994	76.698983	-70.291083	1433	134.390035513941	263.283249444883	357.974736	1
124734287	76.711416	-70.30925	1454	136.197115203469	263.284583870171	332.476608	1
124815723	76.720983	-70.3271	1464	138.00714764551	263.283267409638	268.1463	1
124897191	76.728983	-70.344583	1461	139.799280967317	263.289293536694	178.166125	1
124999028	76.741983	-70.362266	1470	141.569214692342	263.293826390063	357.090736	1
125080507	76.75095	-70.380466	1486	143.439871282249	263.299061253132	260.728008	1
125141690	76.760283	-70.397933	1511	145.233246666505	263.303117315629	218.083791	1
125243725	76.770183	-70.415316	1532	147.017253256148	263.306192960829	236.224833	1
125325456	76.781133	-70.433866	1544	148.922981433977	263.308475468333	222.916433	1
125407316	76.793683	-70.45045	1556	150.607745019163	263.309300484277	236.346628	1
125468775	76.7978	-70.46885	1571	152.565130408178	263.31078230165	317.836444	1
125571303	76.809433	-70.486516	1592	154.383766461348	263.309876827049	179.872099	1
125673867	76.8273	-70.5035	1613	156.08382222003	263.306948656153	278.761672	1
125755927	76.83535	-70.524516	1631	158.305400620005	263.303389851525	249.82537	1
125838126	76.8448	-70.53915	1641	159.825623731123	263.298688615678	368.22985	1
125920344	76.8544	-70.556633	1653	161.65817828884	263.29105154531	149.07816	1
126002652	76.8626	-70.57455	1664	163.551669940591	263.280484014375	341.09795	1
126105754	76.881583	-70.591616	1673	165.279789130023	263.260084043141	187.362882	1
126208796	76.895633	-70.608983	1683	167.08108271647	263.235628987216	244.369856	1
126291336	76.907866	-70.626633	1696	168.930000824903	263.205647112044	262.261583	1
[truncated: 3,565 more rows]
